# Biological convolutions improve DNN robustness to noise and generalisation

Benjamin D. Evans\*, Gaurav Malhotra, and Jeffrey S. Bowers

*School of Psychological Science, University of Bristol, 12a Priory Road, Bristol BS8 1TU, UK.*

8th September 2021

## Abstract

Deep Convolutional Neural Networks (DNNs) have achieved superhuman accuracy on standard image classification benchmarks. Their success has reignited significant interest in their use as models of the primate visual system, bolstered by claims of their architectural and representational similarities. However, closer scrutiny of these models suggests that they rely on various forms of shortcut learning to achieve their impressive performance, such as using texture rather than shape information. Such superficial solutions to image recognition have been shown to make DNNs brittle in the face of more challenging tests such as noise-perturbed or out-of-domain images, casting doubt on their similarity to their biological counterparts. In the present work, we demonstrate that adding fixed biological filter banks, in particular banks of Gabor filters, helps to constrain the networks to avoid reliance on shortcuts, making them develop more structured internal representations and more tolerant to noise. Importantly, they also gained around 20 – 35% improved accuracy when generalising to our novel out-of-domain test image sets over standard end-to-end trained architectures. We take these findings to suggest that these properties of the primate visual system should be incorporated into DNNs to make them more able to cope with real-world vision and better capture some of the more impressive aspects of human visual perception such as generalisation.

**Keywords:** Deep Learning; Convolutional Neural Network; Biological constraint; Gabor filter; Noise tolerance; Generalisation

## 1 Introduction

The success enjoyed by deep convolutional neural networks (DNNs) in complex perceptual tasks, notably image classification, has led many researchers to suggest that they accomplish their objectives in a similar manner to humans. Architectural and representational similarities  
5 further reinforce this view of DNNs, not just as engineering tools, but as good models of primate vision (Cadena et al., 2019; Guclu & van Gerven, 2015; Khaligh-Razavi & Kriegeskorte, 2014; Kubilius et al., 2016; Kubilius et al., 2018; Schrimpf et al., 2018; Yamins et al., 2014; Yamins & DiCarlo, 2016). However, in stark contrast to humans, one of the most striking failures of these models is their lack of ability to generalise outside of their  
10 training sets. This casts doubt on the claims that such models work in a fundamentally similar way to humans.

---

\* Corresponding author: [benjamin.evans@bristol.ac.uk](mailto:benjamin.evans@bristol.ac.uk)

In contradiction to earlier claims that DNNs learn about object shape as a representational basis for their image classifications (Kriegeskorte, 2015; Kubilius et al., 2016; LeCun et al., 2015), subsequent work has found a strong bias towards textures and similar spatially  
15 high-frequency information (Baker et al., 2018; Deza & Konkle, 2021; Geirhos et al., 2019). Likewise in our earlier work, we reported that in the extreme, standard DNNs would base their image classifications on just a single pixel when correlated with image category, disregarding the richer shape information (Malhotra et al., 2020).

The tendency of DNNs to solve tasks in unintended ways has been characterised as  
20 “shortcut learning”, whereby decision rules are learnt which facilitate high performance on standard benchmarks but fail to generalise to more challenging test sets (Geirhos, Jacobsen et al., 2020). In this vein, a range of weaknesses of DNNs have been identified, including susceptibility to adversarial attacks (Szegedy et al., 2014), bias amplification (Bolkubasi et al., 2016) and intolerance to noise (Geirhos et al., 2018). Similarly, other authors have  
25 characterised these shortcomings as the models learning to rely on “non-robust” features that are present in the training data (Ilyas et al., 2019). While these problems could be regarded as properties of the dataset which fail to capture the richness of the visual world, we argue that they stem from insufficient *inductive biases* constraining the model to find more robust and general solutions. To frame it more positively, robust generalisation needs  
30 good inductive biases (Feinman & Lake, 2018; Lake et al., 2017; Sinz et al., 2019).

Inductive biases may be incorporated into the three core components of artificial neural network design: the objective function, the learning rule and the architecture (Richards et al., 2019), in addition to the training data (“environment”). In the present work, we focus on  
35 architectural constraints in the form of prescribed kernels in the first convolutional layer(s), taking inspiration from the receptive fields found in the early primate visual system. This particular form of inductive bias has received relatively little attention in the deep learning community, with a strong preference to instead rely upon full end-to-end training. This is a stark departure from the hand-tuned, featuring-engineering approach of classical computer vision research, despite some of this early work being encouragingly biologically plausible  
40 (Akbarinia & Parraga, 2018a, 2018b; Alahi et al., 2012; Riesenhuber & Poggio, 1999).

Although this approach has led to state-of-the-art scores on common benchmarks, end-to-end trained artificial neural networks (ANNs) have nonspecific (weak) biases and learn the statistics of the training data which may not generalise to out-of-distribution (*o.o.d.*) data (Sinz et al., 2019). Indeed, recent work on contrast normalisation demonstrated that even  
45 a slight deviation from the training distribution is enough to trigger a failure to generalise (Akbarinia & Gil-Rodríguez, 2020). Arguably, this has become to an example of Goodhart’s Law (Strathern, 1997), where DNNs further surpass human performance on common image recognition benchmarks, yet no longer represent good measures as they fail to capture many interesting and elementary properties of visual perception.

50 While end-to-end training typically yields features resembling Gabor filters, an array of other filters emerge which lack a clear correspondence to those observed in the early visual system, further suggesting that DNNs are under-constrained (Krizhevsky et al., 2012, Fig. 3). As expected from the “bias-variance tradeoff” in supervised learning, the approach of fixing early convolutional forms has not (yet) achieved such high performance scores on standard  
55 benchmarks as with full end-to-end training. However, our previous results suggest that they may encourage DNNs to develop more robust and generalisable representations (Malhotra et al., 2020; Malhotra et al., 2019).

Furthermore, there is a strong motivation to fix the early convolutions from both the perspective of natural image statistics (Bell & Sejnowski, 1997; Olshausen & Field, 1996)  
60 and a developmental biology perspective (Briggman et al., 2011). Useful motifs about stable properties of the environment are most likely to pass through the “genomic bottleneck”

conferring an evolutionary advantage by alleviating the burden on the individual to learn them (Zador, 2019), especially if they are “perceptual universals” of the world (Shepard, 1994).

65 Early work with DNNs showed how kernels strongly resembling Gabor filters naturally arise through training on naturalistic images (along with more obscure filters) (Krizhevsky et al., 2012) while recent computational modelling has even demonstrated how the particular hierarchy of receptive fields may arise from the retinal bottleneck (Lindsey et al., 2019). If centre-surround and Gabor filters form a visual alphabet of the natural world then they should  
70 be pre-wired (Gaier & Ha, 2019) or fixed rapidly due to evolution-optimised architectures (Zador, 2019) and remain relatively stable throughout the lifetime of the individual (and so also in models). In contrast to classical computer vision approaches, the features of the early layers are not “*hand-engineered*”, but essentially “*evolution-engineered*”.

Besides potential gains in “real-world” use (through increased resilience to noise and  
75 better *o.o.d.* generalisation), constraining DNNs with biologically-inspired inductive biases may also help to make them more interpretable by encouraging them to develop internal representations which are better aligned with their biological counterparts. This would potentially be a useful development for shining a light on otherwise obscure “black-box” models, allowing their decision processes to be better understood, refined, and overridden  
80 when necessary. Accordingly, we examine the most activating features of the trained models to visualise the differences in their internal representations.

Early work with Gabor kernels in convolutional neural networks focussed on the energy efficiency gains and speed of training convergence afforded by having fewer modifiable parameters while maintaining a structure conducive to image classification (Alekseev &  
85 Bobe, 2019; Meng et al., 2019; Sarwar et al., 2017). However, like other promising research with biologically motivated front-ends, without further constraining the parameters of the Gabor kernels, the models develop an over-reliance on the spatially high-frequency filters and forfeit their robustness to noise (Wu et al., 2019).

In our previous work with Gabor-kernel convolutions, the filters acted as a kind of  
90 regulariser, steering the network away from relying upon non-robust (yet diagnostic) features towards more robust representations (Malhotra et al., 2020; Malhotra et al., 2019). Subsequent work using  $>20\text{--}40\times$  more Gabor filters demonstrated more resilience to adversarial attacks and noise perturbations over the corresponding end-to-end trained models (Dapello et al., 2020). Their study showed that the single biggest factor in attaining this improvement  
95 was the inclusion of stochasticity (Gaussian noise), particularly during training. This further suggests that the modifications worked to help the model develop more robust representations, in a way accounted for in earlier work by training on similar noise to the test set (Geirhos, Temme et al., 2020).

In the work presented here, we specifically examined the form of fixed kernels in the early  
100 convolutional layers of otherwise standard DNNs for their effects on internal representations, robustness to noise, and generalisation beyond the training set. In particular, we investigated a very human *o.o.d.* generalisation ability — to classify images based on simple line drawings (Hochberg & Brooks, 1962), their global shape features or their bounding contours rather than local textures (Baker et al., 2018).

105 We hypothesised that biologically inspired filter banks would make the models (a) more robust to noise perturbations applied to *i.i.d.* images, (b) better able to generalise to *o.o.d.* images and (c) develop more interpretable internal representations. Our results support these hypotheses for several types of common noise perturbations, reveal a 20 – 35% improvement in accuracy on our novel generalisation test sets and demonstrate striking differences in the  
110 internal representations.

## 2 Methods

Standard deep convolutional neural networks were trained with full end-to-end learning to obtain their baseline performance on image classification tasks. Each model architecture was then modified by configuring the first convolutional layer(s) to have fixed banks of kernels for each of several forms described below. These modified models were then trained on the same images as the standard models for 100 epochs to ensure that they reached convergence. The models were then compared by their performance on noise-perturbed validation images, generalisation test images and their internal representations. The models were implemented with Keras and Tensorflow 2. All simulation and analysis code (written in Python 3) is open-source and available at [github.com/bdevans/BioNet](https://github.com/bdevans/BioNet).

### 2.1 Models

Several standard DNN architectures were used including ALL-CNN (Springenberg et al., 2015), ResNet50 (He et al., 2016) and VGG-16 (Simonyan & Zisserman, 2015). For each model, either the original architecture was used (“Original”) for full “end-to-end” training or the first convolutional layer was replaced with a bank of unmodifiable kernels. These fixed kernels took one of the following specific forms: Gabor, Difference of Gaussians (DoG) or Low-pass filters (chosen as a non-biologically motivated alternative way to smooth out noise). A “Combined” front-end was also used, whereby the first convolutional layer of a standard DNN was replaced with two fixed convolutional layers consisting of a DoG layer followed by a Gabor layer, modelling the receptive field organisation of the early visual stream. Each fixed kernel was set to  $63 \times 63$  pixels in order to allow the filters to be adequately expressed without significant truncation at the edges, over a biologically relevant range of spatial scales. In the case of the Combined front-end, the kernels were reduced to  $31 \times 31$  pixels due to computational constraints. The choice of (other) parameters for these convolutional kernels are given in Table 1 and the resulting kernels are visualised in Figure 1.

In all cases, the input layer was modified to reflect the upscaled image size and conversion to greyscale, leaving only one luminance channel ( $224 \times 224 \times 1$ ) as described in Section 2.3. Similarly, the output layer was reduced to classify each images into one of the 10 categories of CIFAR-10.

#### 2.1.1 Fixed convolutional kernels

**Low-Pass:** Low-pass filters were implemented as a simple 2-dimensional Gaussian kernel (Equation 1) which was convolved with the inputs, effectively blurring them by a degree parameterised by  $\sigma$ , the standard deviation of the Gaussian.

$$l_{\sigma}(x, y) = \frac{1}{2\pi\sigma^2} e^{-\frac{x^2+y^2}{2\sigma^2}} \quad (1)$$

In the models presented, four channels (corresponding to four values of sigma) were used for the low-pass front-end as detailed in Table 1 and are shown in Figure 1a.

**Difference of Gaussian:** The Difference of Gaussians kernel (Equation 2) is the result of a surround Gaussian subtracted from a (typically smaller) centre Gaussian. The standard deviation of the centre Gaussian is parameterised by  $\sigma$  and the standard deviation of the surround Gaussian is parameterised by  $\gamma \cdot \sigma$  where  $\gamma \geq 1$ . In this work, the difference in Gaussians is multiplied by  $\rho \in \{+1, -1\}$  to model “on-” and “off-centre” ganglion cell receptive fields respectively.

$$d_{\sigma,\gamma,\rho}(x, y) = \rho \left( \frac{1}{2\pi\sigma^2} \exp\left(-\frac{x^2+y^2}{2\sigma^2}\right) - \frac{1}{2\pi\gamma^2\sigma^2} \exp\left(-\frac{x^2+y^2}{2\gamma^2\sigma^2}\right) \right) \quad (2)$$

The Difference of Gaussians front-end had a total of 32 channels from combining values for three parameters as described in Table 1 and are shown in Figure 1b.

**Gabor:** The Gabor function is an oriented sinusoidal grating convolved with a Gaussian envelope (Equations 3-5) where  $x$  and  $y$  specify the position of a light impulse in the visual field (Petkov & Kruizinga, 1997).

$$g_{\lambda,\theta,\phi,\sigma,\gamma}(x,y) = \exp\left(-\frac{x_{\theta}^2 + \gamma^2 y_{\theta}^2}{2\sigma^2}\right) \exp\left(i\left(\frac{2\pi x_{\theta}}{\lambda} + \phi\right)\right) \quad (3)$$

$$x_{\theta} = x \cos \theta + y \sin \theta \quad y_{\theta} = -x \sin \theta + y \cos \theta \quad (4)$$

Rather than specify the wavelength of the sinusoidal component ( $\lambda$ ) in pixels, it is more natural to set the bandwidth,  $b$ , which describes the number of cycles of the sinusoid within the Gaussian envelope, (which has a fixed standard deviation,  $\sigma$ , matched to the other front-ends). The wavelength of the sinusoidal factor,  $\lambda$ , is therefore set indirectly through  $b$ , and  $\sigma$ :

$$\lambda = \sigma \cdot \pi \cdot \sqrt{\frac{2}{\ln 2}} \cdot \frac{2^b - 1}{2^b + 1} \quad (5)$$

The Gabor front-end used had a total of 24 channels from combinations of values across its five parameters, chosen to span a range matched to primate primary visual cortex (Petkov & Kruizinga, 1997), shown in Table 1 and visualised in Figure 1c.

Table 1: Parameters of the fixed convolutional kernels.

| Low-pass                  | Difference of Gaussians           | Gabor                                                           |
|---------------------------|-----------------------------------|-----------------------------------------------------------------|
| $\sigma = \{1, 2, 4, 8\}$ | $\sigma = \{1, 2, 4, 8\}$         | $\sigma = \{8\}$                                                |
|                           | $\gamma = \{1.6, 1.8, 2.0, 2.2\}$ | $\gamma = \{0.5\}$                                              |
|                           | $\rho = \{+1, -1\}$               | $b = \{1, 1.8, 2.6\}$                                           |
|                           |                                   | $\theta = \{0, \frac{\pi}{4}, \frac{2\pi}{4}, \frac{3\pi}{4}\}$ |
|                           |                                   | $\psi = \{\frac{\pi}{2}, \frac{3\pi}{2}\}$                      |

In the case of the Combined front-end models, the kernels of the first two convolutional layers are as shown in the DoG and Gabor plots (Figure 1b&c), however the kernel (canvas) size was reduced to  $\frac{1}{4}$  of their size ( $31 \times 31$  pixels) due to memory limitations.

## 2.2 Training

All models were trained with the modified ( $224 \times 224$  and greyscale) CIFAR-10 training images (unperturbed and shuffled) to minimise categorical cross-entropy using Stochastic Gradient Descent (SGD) with a batch size of 64, a learning rate of  $10^{-4}$  and a decay of  $10^{-6}$ . Training proceeded for 100 epochs, reducing the learning rate on plateau (after 5 epochs) by a factor of 0.2. Each model architecture was trained for five different random seed initialisations (eliminating seeds which failed to train) on NVIDIA GPUs.

Example kernels learnt in the first convolutional layer through this training procedure are illustrated in Figure 11. These 64 kernels are taken from a VGG-16 model (modified and trained as described) with each being  $3 \times 3$  pixels in size.

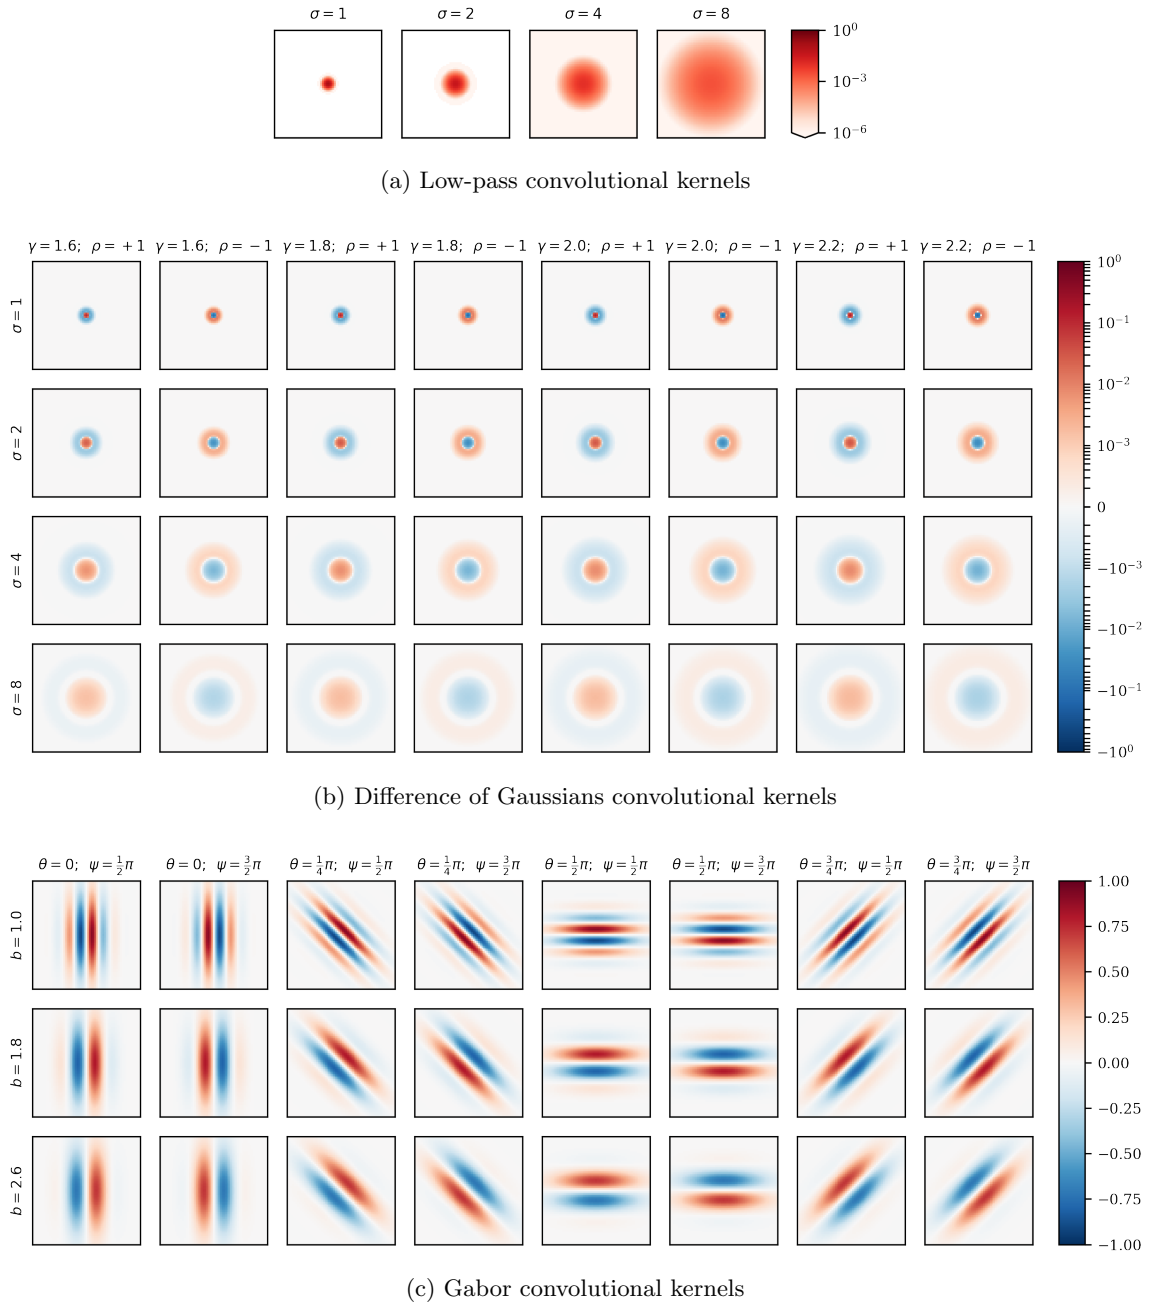

Figure 1: Illustration of the banks of fixed kernels used in the first convolutional layer(s).

## 2.3 Stimuli

In all cases, the training images were based on the CIFAR-10 dataset (which contains  
 180 10 classes of 6,000 images per class, with 1,000 of each held out for validation, see  
[www.cs.toronto.edu/~kriz/cifar.html](http://www.cs.toronto.edu/~kriz/cifar.html)). For testing, three categories of images were  
 used; CIFAR-10 validation images, noise-perturbed CIFAR-10 validation images or general-  
 isation image sets (described later).

To simplify the filter banks, we converted all images to greyscale according to the ITU  
 185 BT.601 luma transform conversion formula ( $Y = 0.299 \cdot R + 0.587 \cdot G + 0.114 \cdot B$ ), which models  
 the trichromatic sensitivities of the human eye. Using a method similar to (Geirhos et al.,  
 2018), the CIFAR-10 images were then upscaled from their original dimensions of  $32 \times 32$   
 pixels to  $224 \times 224$  pixels using Lanczos resampling with luminosities clipped to  $[0, 255]$ . Each  
 image was further preprocessed before presentation to the network by rescaling the intensity  
 190 values from  $[0, 255]$  to  $[0, 1]$ . Under testing conditions where the images were perturbed,  
 noise was applied after this rescaling, then the values were clipped in the range  $[0, 1]$  before  
 rescaling back to the range  $[0, 255]$ , as expected by the standard DNN architectures.

The mean and standard deviation were calculated across the entire (modified) training  
 set and used for feature-wise centring and normalisation. Data augmentation was used  
 195 to randomly shift the images vertically and horizontally by up to 10% (24 pixels) and to  
 randomly apply a horizontal flip.

### 2.3.1 Noise perturbations

Building on the work of (Geirhos, Temme et al., 2020) we explored the robustness of repres-  
 entations developed in DNNs with the range of different trainable and fixed convolutional  
 200 kernels described. The CIFAR-10 validation images were perturbed with a battery of common  
 types of noise, systematically spanning a range of severity, before being presented to the  
 networks. A summary of these noise perturbations is given in Table 2 with an illustration of  
 them applied to one of the validation images in Figure 2.

Table 2: Image perturbation descriptions and severity.

| Perturbation     | Description                                                                                               | Levels                                      |
|------------------|-----------------------------------------------------------------------------------------------------------|---------------------------------------------|
| Uniform          | Pixel-wise additive uniform noise drawn from $[-w, +w]$ then clipped at $[0, 1]$ .                        | $w \in \{0, 0.1, \dots, 0.9, 1.0\}$         |
| Salt and Pepper  | Pixels are randomly set to either black or white with probability, $p$ .                                  | $p \in \{0, 0.1, \dots, 0.9, 1.0\}$         |
| High-Pass        | High-pass filtering with standard deviation of the Gaussian filter, $\sigma$ .                            | $\sigma \in 10^{\{2, 1.8, \dots, 0.2, 0\}}$ |
| Low-Pass         | Low-pass filtering with standard deviation of the Gaussian filter, $\sigma$ .                             | $\sigma \in 10^{\{0, 0.2, \dots, 1.8, 2\}}$ |
| Contrast         | Contrast, $c$ adjusted by setting each pixel intensity, $i$ , according to $i' = (1 - c)/2 + i \cdot c$ . | $c \in \{1, 0.9, \dots, 0.1, 0\}$           |
| Phase Scrambling | Phases are randomly shifted (in the Fourier domain) in the interval $[-w, +w]$ degrees.                   | $w \in \{0, 18, \dots, 162, 180\}$          |
| Darken           | Each pixel intensity, $i$ , is reduced by $l$ .                                                           | $l \in \{0, 0.1, \dots, 0.9, 1\}$           |
| Brighten         | Each pixel intensity, $i$ , is increased by $l$ .                                                         | $l \in \{0, 0.1, \dots, 0.9, 1\}$           |
| Rotation         | Each image is rotated by $\theta$ degrees.                                                                | $\theta \in \{0, 90, 180, 270\}$            |
| Inversion        | Pixel intensities are inverted.                                                                           | $v \in \{0, 1\}$                            |

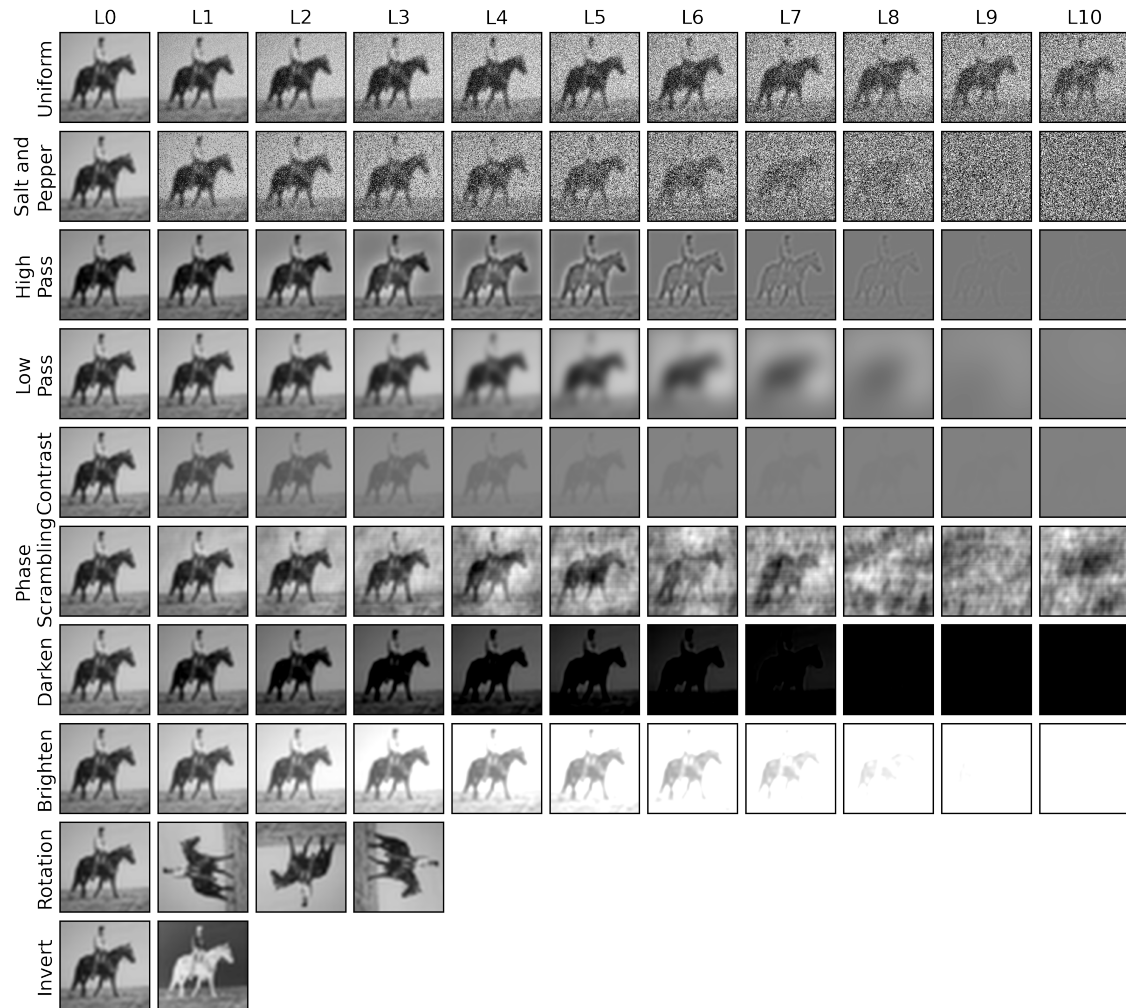

Figure 2: Noise perturbations at each level applied to an example CIFAR-10 image.



### 2.3.2 Generalisation Images

205 To test the networks’ abilities to classify images outside of the training set, we created a novel set of stylised (monochrome) test images (CIFAR-10G) for each of the ten CIFAR-10 categories. These images contain mainly shape information, with very limited or no texture information at all, providing a means to assess a model’s ability to classify images without  
210 are out-of-distribution (*o.o.d.*) in contrast to the reserved validation images which are independent and identically distributed (*i.i.d.*), as commonly used in machine learning research.

The images constituted three independent generalisation test sets: *line drawings*, *silhouettes* and *contours*. Each set had ten examples for each of the ten CIFAR-10 categories.  
215 The contour images were derived from the silhouettes by hollowing out the shaded regions to leave only their outlines using the GNU Image Manipulation Program (GIMP). Finally, three additional sets were created by inverting the initial three sets. They came from a variety of internet sources but were all designated as free to use for commercial or other purposes. All six generalisation test sets are illustrated in Figure 3.

220 As a confirmation that these new generalisation image sets are truly *o.o.d.*, the summary statistics (mean and standard deviation) of each image are plotted, along with those of the modified CIFAR-10 train and validation sets, in Figure 4. Since the pixel intensities are rescaled to lie in the range  $[0, 1]$ , the inverted images are reflected about the midpoint ( $x = 0.5$ ) with respect to the original images they were derived from. While the training  
225 and validation sets lie on top of each other in the central region of the space, due to their sparse, largely binarised pixel intensities, the generalisation test sets lie on a manifold arcing around the edge of the space. This spatial separation demonstrates that they constitute out-of-domain test sets with respect to the CIFAR-10 images.

## 3 Results

### 230 3.1 Effect of the base model

We first checked that each model has broadly similar accuracy on the (unperturbed) CIFAR-10 validation set, and that the pattern of differences due to the different convolutional “front-ends” holds for different “back-end” architectures. In Figure 5, the mean accuracy for each model (front-end / back-end combination) is plotted with the error bars representing the  
235 95% confidence intervals calculated from five different random seeds.

While the absolute levels of accuracy varied across the different architectures (with the performance of ALL-CNN being relatively low), importantly the relative pattern across front-ends remained very similar. We note from preliminary testing that, contrary to the trend of using deeper networks, the accuracy was largely unchanged after increasing the  
240 depth of the model from VGG-16 to VGG-19. We note also that even the best performing models attain only around 90% accuracy, making them fall short from state-of-the-art for image classification. However, these figures serve as an adequate baseline for comparison to each model’s performance under more challenging and psychologically meaningful conditions.

### 3.2 Robustness to noise

245 After training to convergence on the modified (monochrome and upscaled) CIFAR-10 training images, the networks were tested on the CIFAR-10 validation set with various types and degrees of common noise perturbation, as described in Table 2.

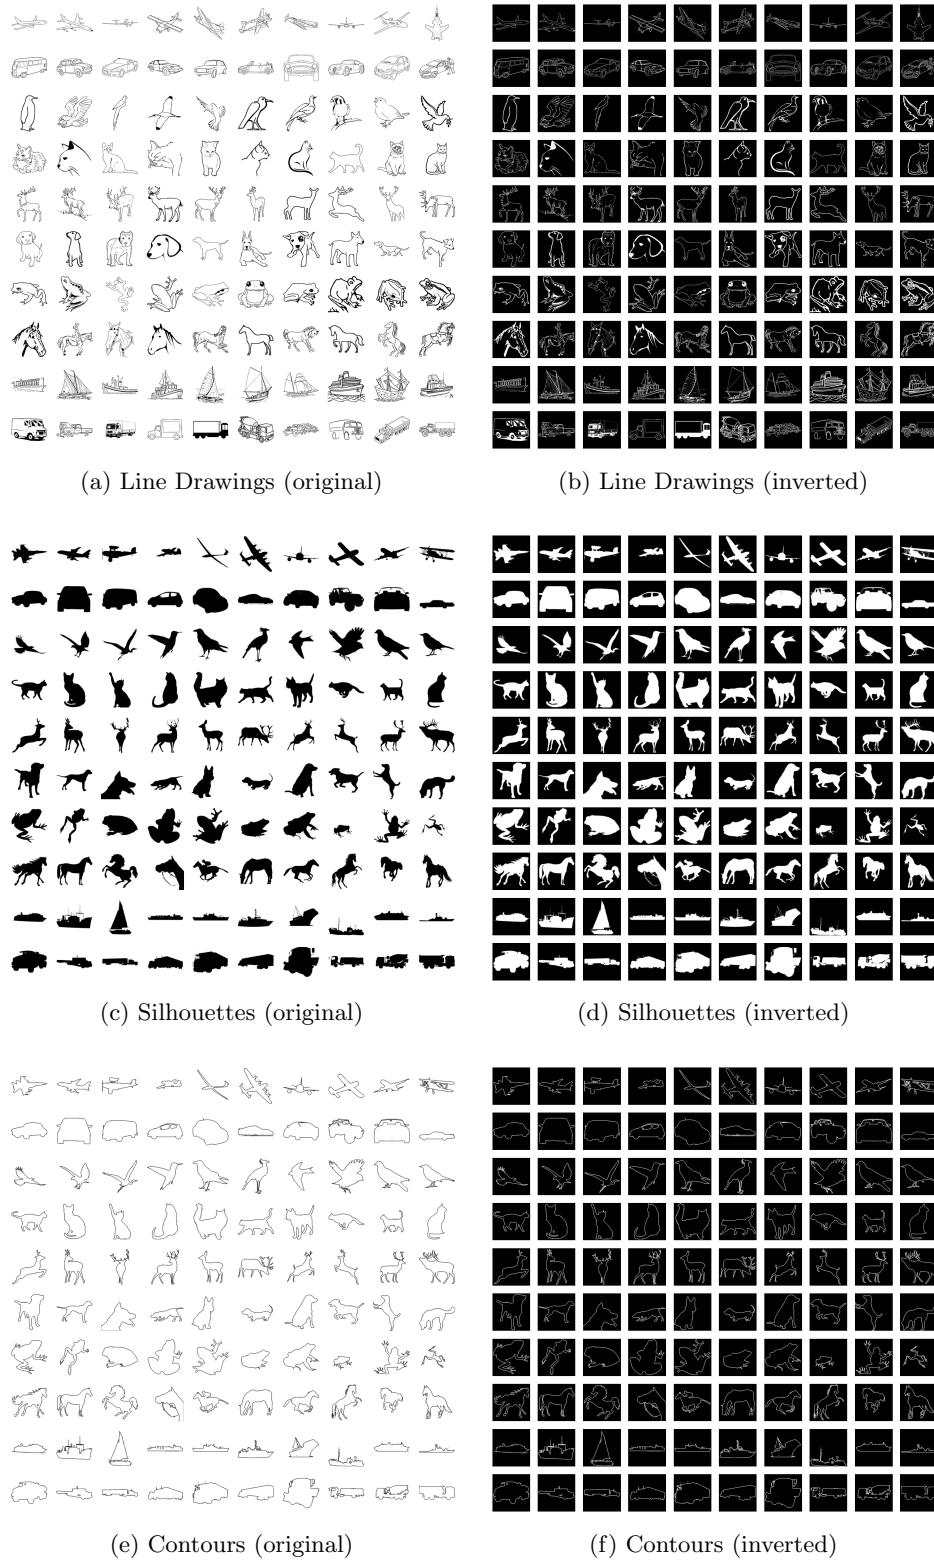

Figure 3: Generalisation test sets.

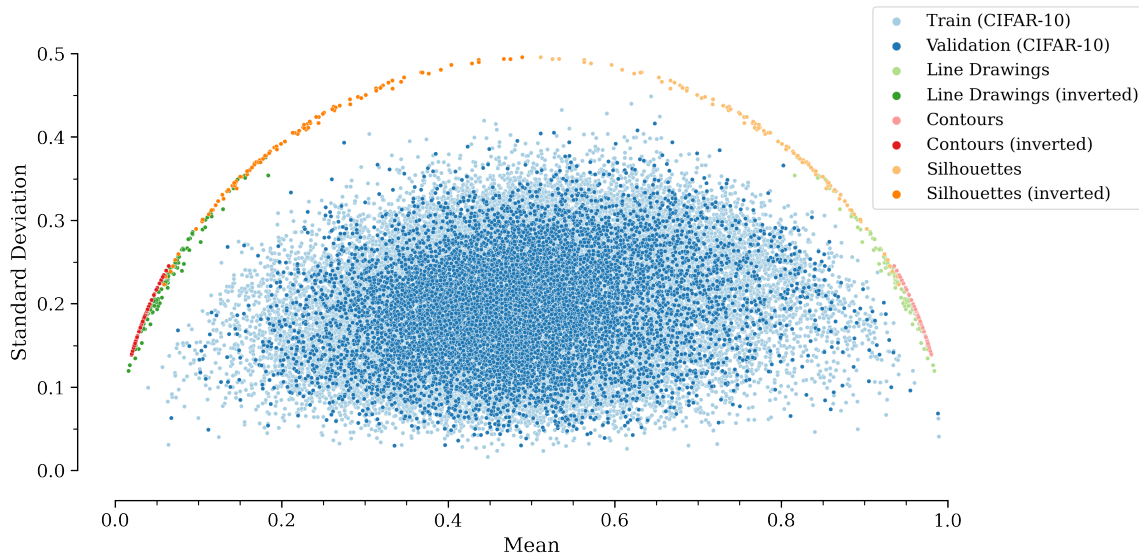

Figure 4: Distributions of image statistics. The CIFAR-10 training and validation images are highly overlapping and occupy the central region of the space. Conversely, the generalisation images lie on a manifold forming an arc around this region, constituting out-of-domain test sets.

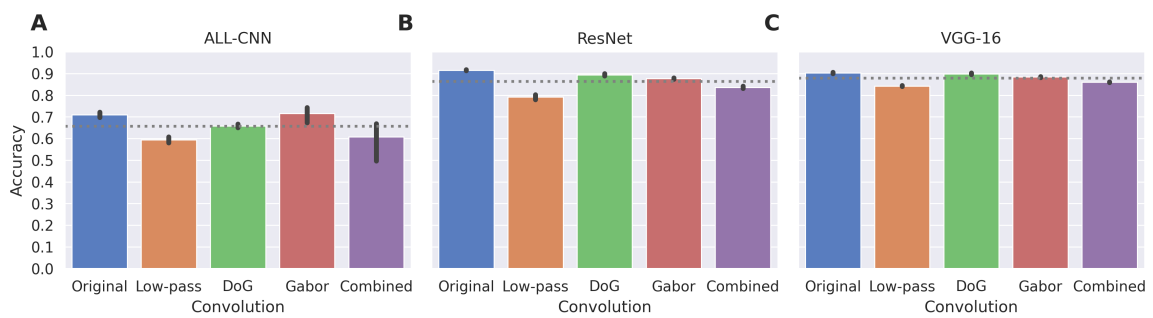

Figure 5: Classification accuracy on the CIFAR-10 validation set. The ResNet and VGG models attained very similar levels of performance across all convolutional front-ends (around 90% accuracy) while ALL-CNN scored around 20% lower with more variability across front-ends. The line in each bar indicates the 95% confidence interval across the five random seeds. Grey dotted lines indicate the mean accuracy across convolutions for each base model architecture.

Classification accuracy across the five runs of the VGG-16 based models for each convolutional front-end under various levels of noise are given in Figure 6 as an example. The performance curves for ALL-CNN and ResNet50 are given in Figures 12 and 13 respectively.

The perturbations used in this research are based upon previously published tests and common image degradations (Geirhos, Temme et al., 2020). As such, the fixed convolutional kernels used are not expected to lead to robustness in all cases. Earlier work suggests that resilience to uniform and salt-and-pepper noise should be improved (Malhotra et al., 2020; Malhotra et al., 2019). Additionally, biologically inspired filters are expected to be more resilient to brightened, darkened and reduced contrast images due to their regions of opponency which make them sensitive to spatial contrasts rather than absolute luminance levels. Conversely, end-to-end trained models are likely to maintain higher performance for high-pass filtered images owing to their preference for spatially high-frequency information such as their texture bias (Geirhos et al., 2019). For other perturbations such as rotation, we have no strong expectation of either an increase or decrease in robustness performance relative to the standard model.

In many cases, the biologically-inspired hard-coded convolutional front-ends (Gabor filters, Difference of Gaussians and Combined) are more or similarly robust to these types of image corruptions than their end-to-end trained counterparts (with the exception of High Pass perturbations). In particular, the Gabor and Combined models exhibited considerably more tolerance to Uniform and Salt and Pepper noise (Figure 6A&B) partly due to their smoothing effect. However, this characteristic alone can not entirely explain their large margin of improvement over other filters, due to the relatively poor performance of Low-pass filtered models under the same conditions, which serve as null models to test this idea. Instead, the combination of smoothing within a spatially structured kernel (i.e. elongated regions of opponency) appears to have helped reduce the effect of such unstructured noise on classification of natural images which consist of such spatially-structured features such as bars and edges (Bell & Sejnowski, 1997; Olshausen & Field, 1996). Gabor filters thereby offer the combination of edge-detection *and* spatial smoothing, helping them detect fundamental visual features while reducing their noise.

Interestingly, the Gabor-filtered networks tend to perform worse than the others when classifying images processed with High Pass filtering, (Figure 6C), presumably due to their bandwidth and spatial scale no longer being appropriate for the thinner edges and lines in this condition.

For perturbations such as phase scrambling and rotations (Figure 6F&I) all types of filter are quite similarly affected. Broadly comparable perturbation tolerance was also obtained for Contrast, Darken and Brighten (Figure 6E,G&H), with the exception of the Low-pass front-end, which was found to smooth away the finer details of the images, further reducing their contrast and reducing activation in subsequent layers.

While the Combined models exhibited similar patterns of tolerance to noise perturbation as the Gabor models, the absolute accuracy was typically lower. This may be explained by the information lost due to the extra DoG layer, as they may only occur in the visual system as a means of overcoming the retinal bottleneck (Lindsey et al., 2019). However, one notable exception is in the case of image inversion (Figure 6J) where most models drop by around 30% accuracy, whereas the Combined model is essentially unaffected. This is investigated further in Section 3.3.

While the original (unperturbed) validation images are *i.i.d.* with the training set (as illustrated in Figure 4), the models were not trained with any of the noise types, making this experiment a mild test of *o.o.d.* generalisation and a good test of more “real-world” image classification conditions.

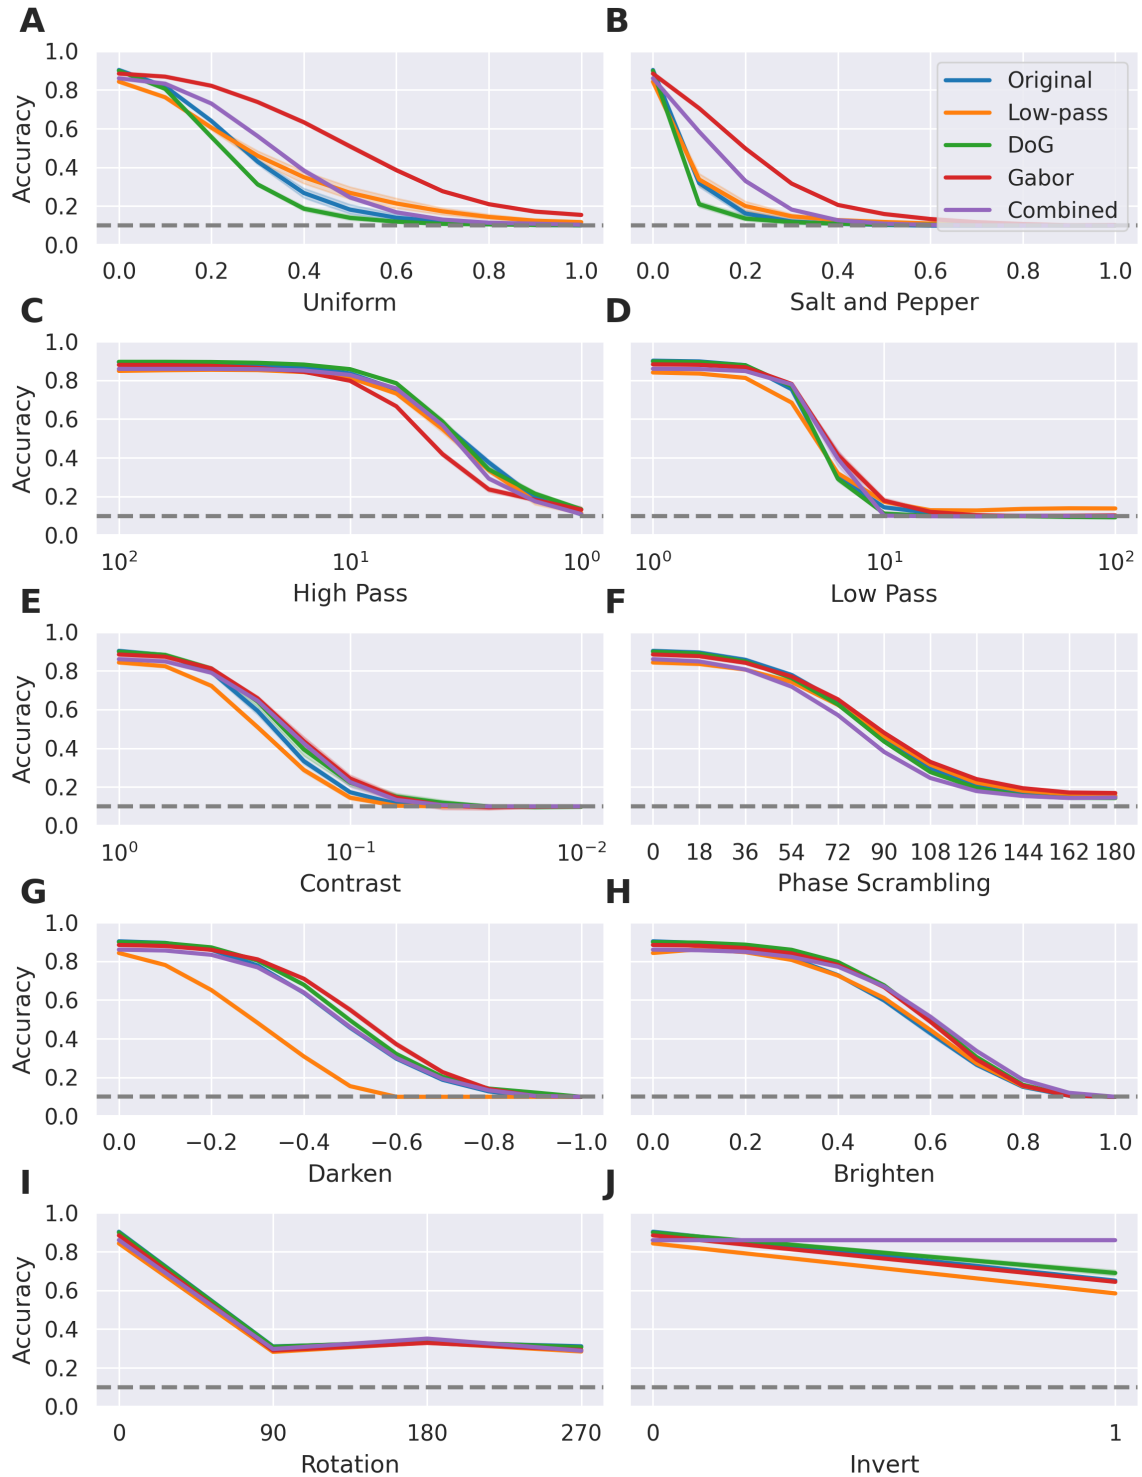

Figure 6: Classification accuracy of VGG-16 based models under each type and degree of noise perturbation. The Gabor and Combined front-ends are particularly resilient to Uniform and Salt and Pepper noise, while the Combined front-end is able to recognise inverted images. Shading around each line indicates the 95% confidence interval across the five random seeds. The grey dashed lines represent chance level (10%) performance.

### 3.3 Generalisation

As a strong test of *o.o.d.* generalisation, the models' classification accuracy was assessed on the novel, stylised image test sets collected for this study (as shown in Figure 7). In almost all cases, networks with a Combined front-end scored highest, closely followed by Gabor models. One exception is on the silhouette test sets (original and inverted) where the Gabor front-end models outperformed the Combined models since these images had only edges (rather than other features such as lines) which the initial layer of DoG kernels are less sensitive to compared to Gabor kernels. Following those models, either the Difference of Gaussian or the Low-pass front-ends tended to slightly outperform the baseline Original models but were broadly comparable.

The original end-to-end trained models trail those which include a bank of Gabor filters (Gabor, Combined) by approximately 10% across generalisation test sets for ALL-CNN, 15 – 35% for ResNet models and 20 – 30% for VGG models. While there is clearly room for further improvement, these results demonstrate that a substantial margin in performance is conferred on standard DNNs in *o.o.d.* test images simply by fixing the form of the first layer of convolutions with biologically-plausible Gabor kernels.

Again the Combined front-end exhibits no performance drop associated with inverting the images, (see Figure 7, left column versus right column) unlike small but consistent drops for most other front-ends, especially the Low-pass models. Inspection of the activation patterns in the early layers of the Combined models reveals that the initial DoG layer provides an effective remapping of the inputs. Since for each DoG filter spatial scale and centre-surround ratio there is both an “on-” and “off-centre” receptive field, they can be matched to the inverted or original images (respectively) to yield the same activation pattern for each. Subsequently, the set of odd Gabor filters are then applied to these contrast-enhanced activation patterns to extract the edges as a foundation for more complex representations in subsequent layers (Figure 8). Essentially, having a layer of on- and off-centre DoGs followed by Gabor filters with equal and opposite phases means that opposite combinations of these filters could be matched to produce the same patterns of activation for both an original image and an inversion of it, as shown by the cosine similarity measures.

In order to test how the convolutional front-ends affect the the models' abilities to accurately classify *o.o.d* images under noisy conditions, we applied the same battery of image perturbations (shown in Figure 2) to the generalisation test image sets (shown in Figure 3). The results for one example generalisation test set — line drawings — are shown in Figure 9 on the VGG-16 model architecture. Results for the other generalisation test sets (obtained with the same model architecture) are presented in the Appendix (Figures 14–18).

Generally, the advantage conferred on the models by the biologically-inspired kernels holds across the set of perturbations, with their performance degrading more slowly relative to the Original front-end. In some cases the classification accuracy of the models improves slightly as the strength of perturbation increases. In the case of Low Pass perturbations (Figure 9D), this is likely due to the smoothing effect thickening the lines of the drawings, making them better able to activate the filters of the first convolutional layer (whether fixed or learnt from naturalistic images). It is less clear why there would be an improvement to classification after applying, for example, Phase Scrambling but it is likely that such perturbations simply brought the images away from their outlying manifold (Figure 4) and closer to the image statistics of the training set.

### 3.4 Representations

In order to examine how the models' internal representations are affected by the form of the initial convolutional kernels, the most activating features were determined for a selection

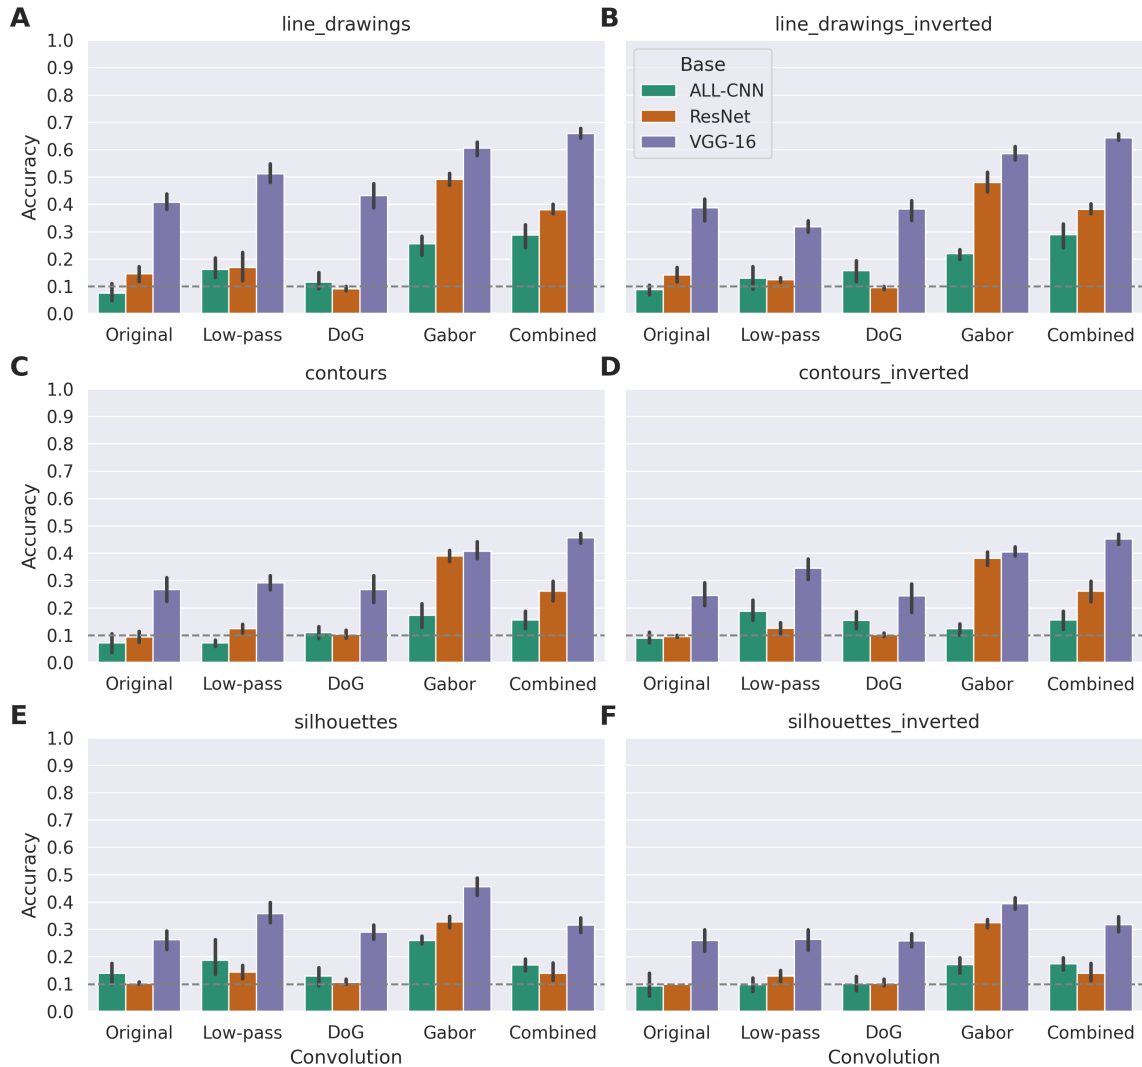

Figure 7: Classification accuracy for generalisation test sets. In classifying out-of-domain images, the Original (end-to-end) trained models typically score lowest. Classification accuracy with the Low-pass front end is slightly higher on average but less consistent across the test sets. The biologically-inspired convolutional front-ends have comparable performance (DoG front-ends) or substantially exceed the accuracy of the Original models (Gabor and Combined front-ends). Generally, all models score highest on the line drawings, with contours and silhouettes presenting the biggest challenges. The line in each bar indicates the 95% confidence interval across the five random seeds. The grey dashed lines represent chance level (10%) performance.

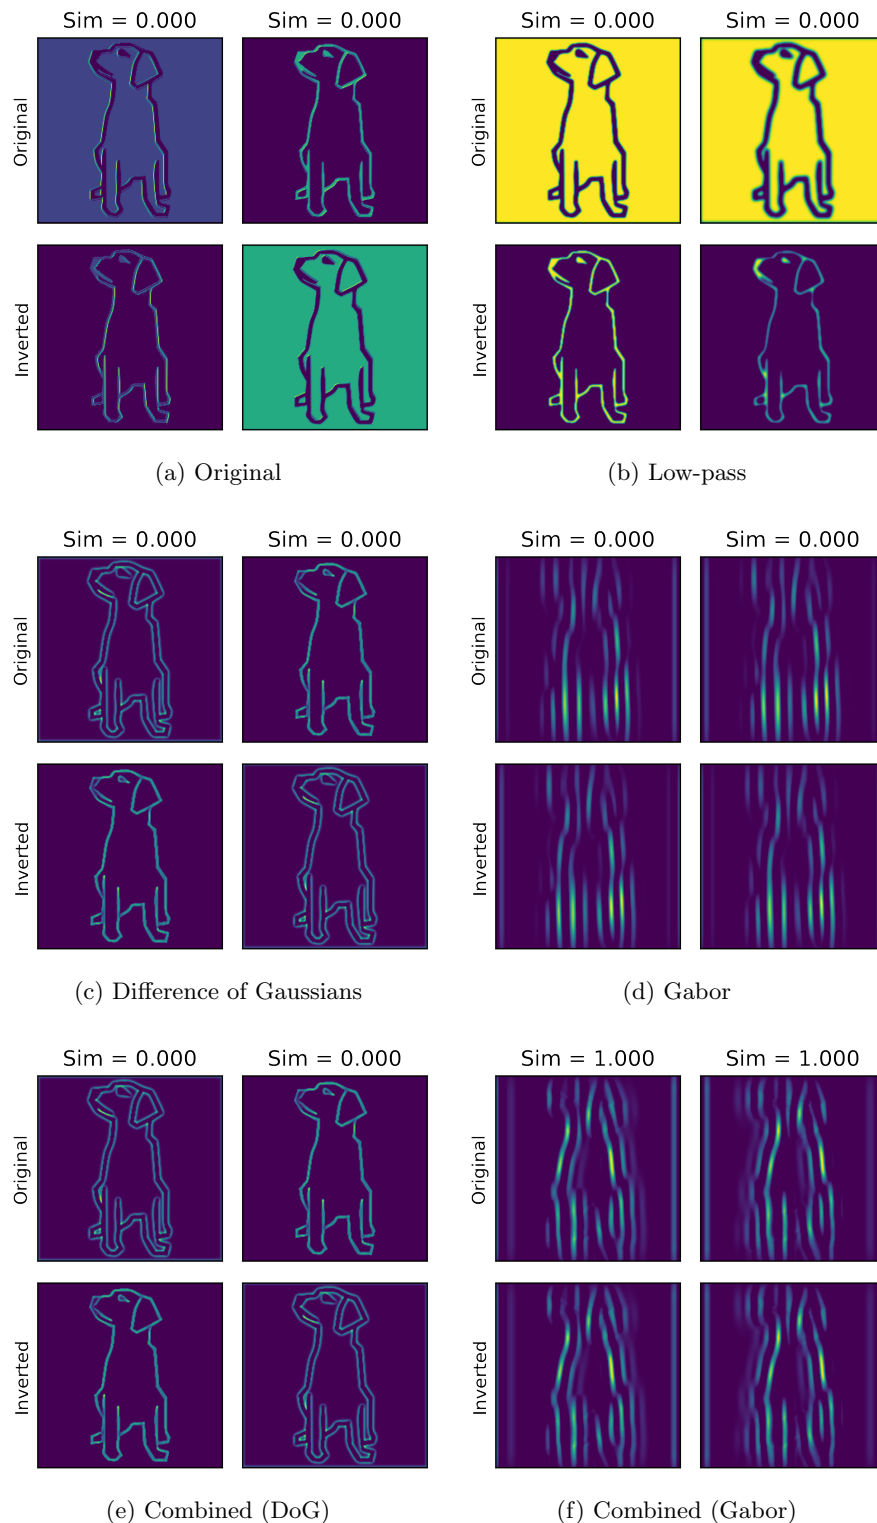

Figure 8: Activation maps generated from an example image and its inversion in the first four channels of the first convolutional layer(s). While the activations for the original and inverted images in the Gabor convolutions (d) appear similar to those in the Gabor layer of the Combined model (f), they are shifted with respect to one another. Conversely the preprocessing of the Combined front-end's DoG layer (e) compensates for this phase-shift. The cosine similarities are shown for pairs of activations resulting from the original and inverted images.



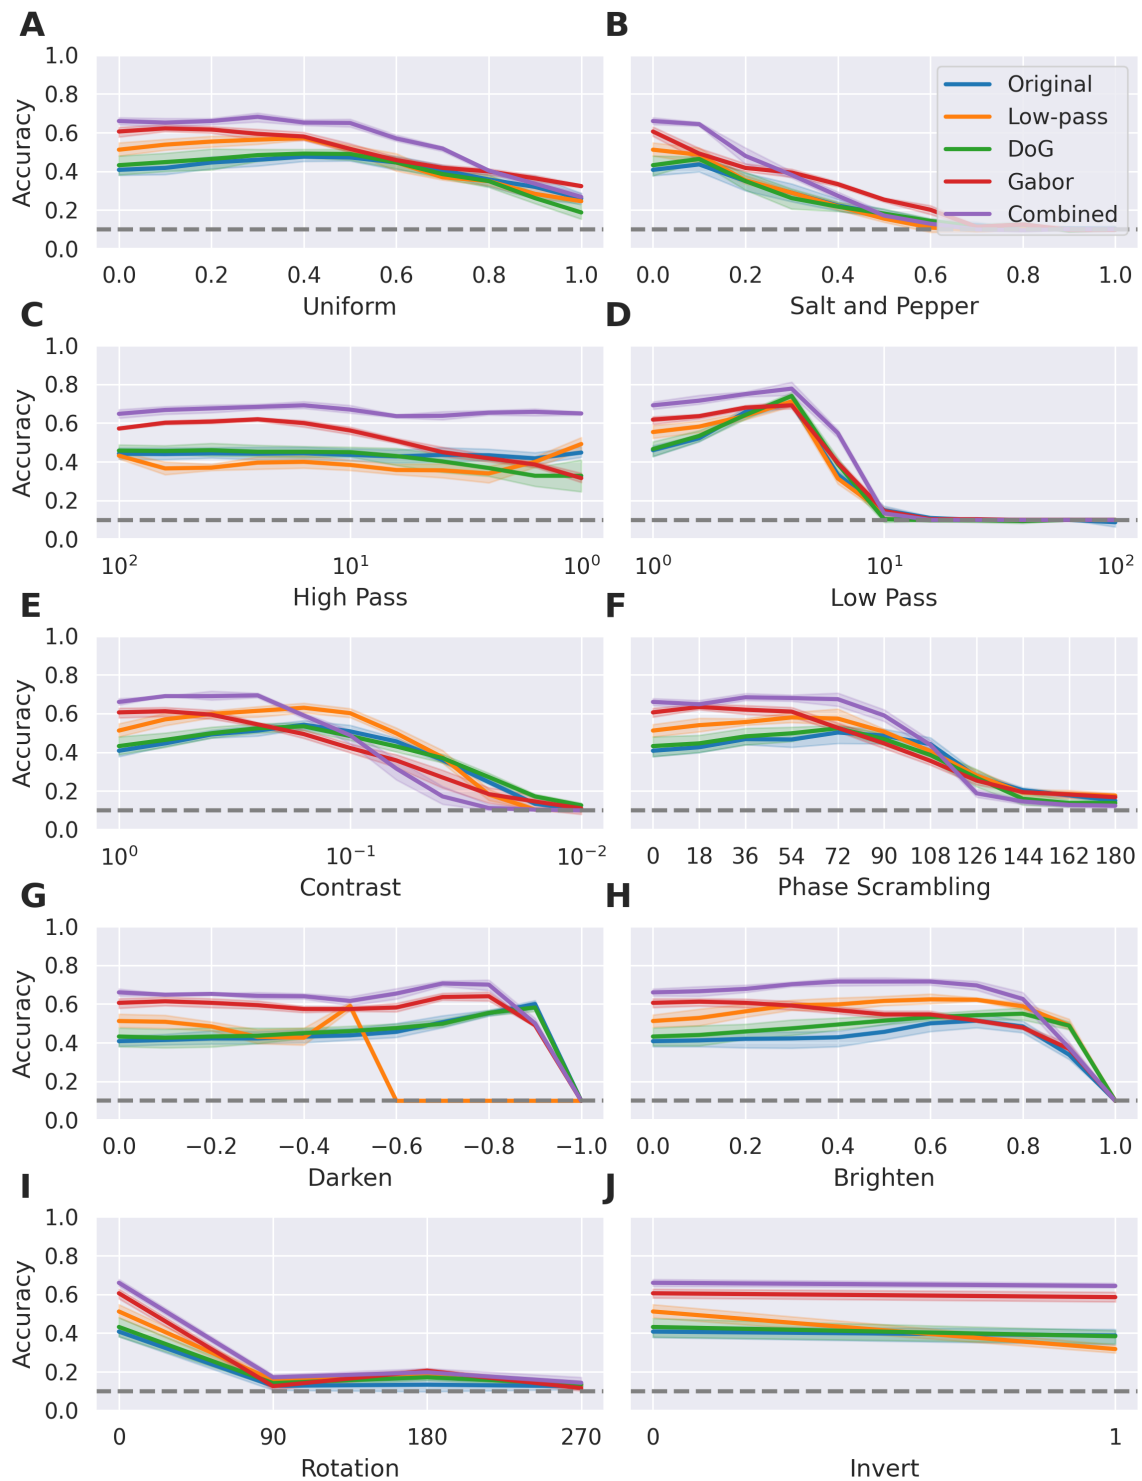

Figure 9: Classification accuracy of VGG-16 based models on perturbed line drawings. The models with biologically-inspired convolutional front-ends (notably Gabor and Combined front-ends) typically maintain their advantage over the Original (end-to-end trained) models with the exception of low contrast and very dark perturbations. Shading around each line indicates the 95% confidence interval across the five random seeds. The grey dashed lines represent chance level (10%) performance.

345 of layers (Erhan et al., 2009). Initially, an image composed of random pixel intensities is presented to each model, which is then modified through gradient ascent for 1,000 epochs to find the most activating feature(s) for that particular channel (subject to the random initialisation). The example channels were randomly chosen from the pooling layers, as they would effectively tile the preferred features of the preceding convolutional layer across the input canvas (although the convolutional layers produced very similar results). Representative  
350 examples of the most activating features for each of the VGG-16 based models (for each front-end) are visualised in Figure 10.

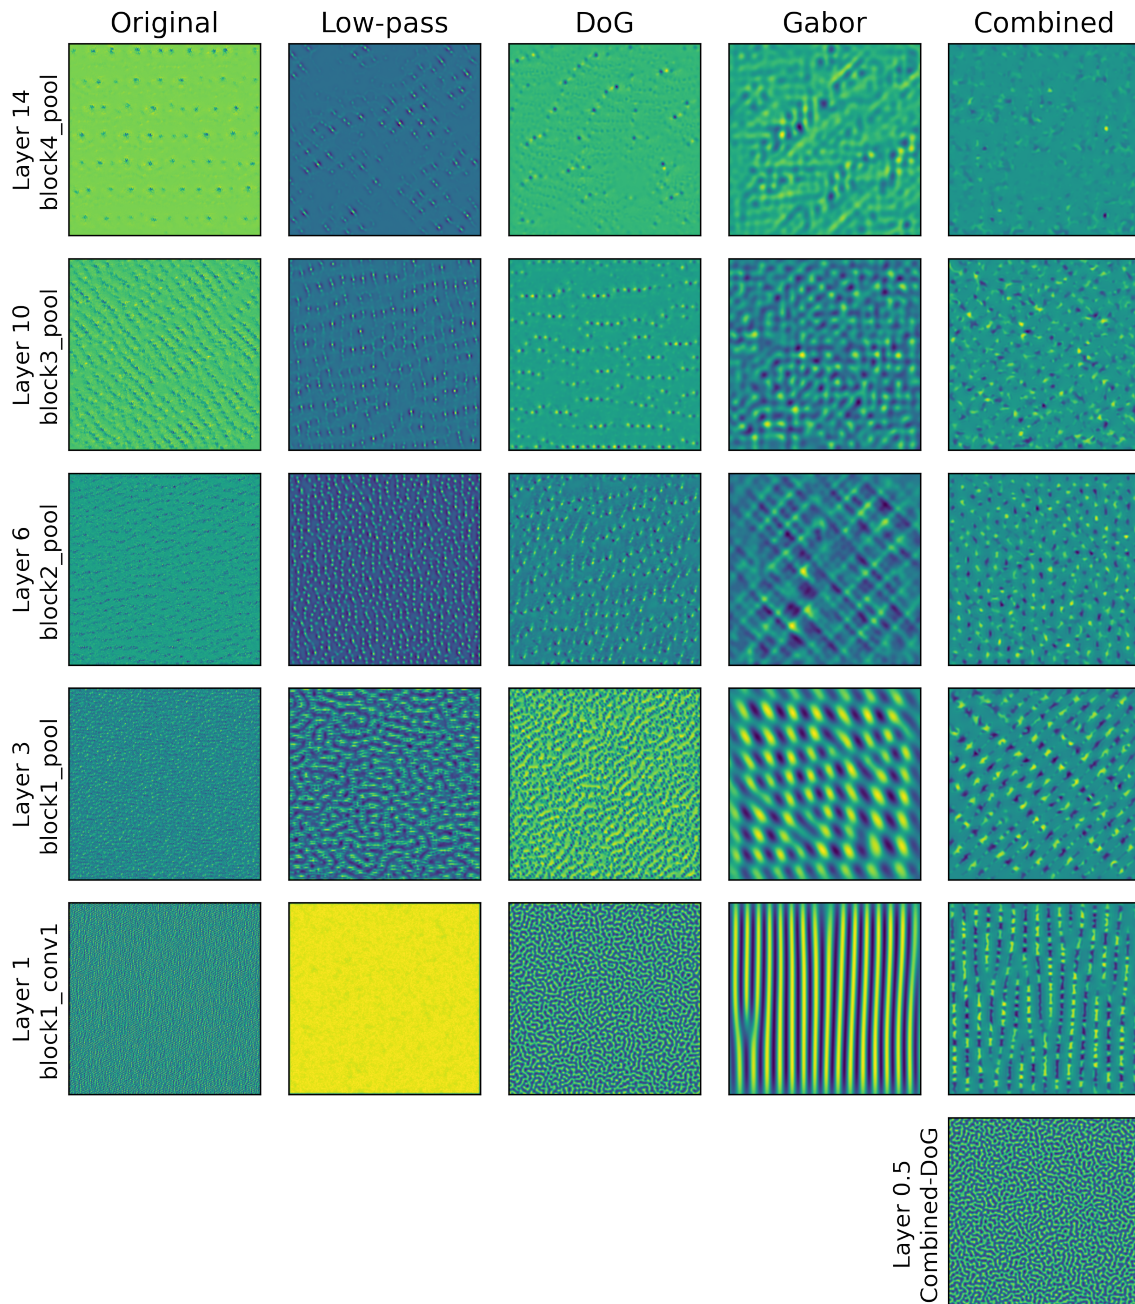

Figure 10: Most activating features for a selection of layers in models based on VGG-16 with different initial convolutional layers.

There are clear differences in the most activating features across the different front-

ends, evident in the visualisations, particularly in the earlier layers. The end-to-end trained  
355 (Original front-end) network prefers less structured and spatially very high-frequency patterns  
resembling noise. Conversely, the fixed kernel front-ends are all more activated by smoother,  
more structured patterns, with Turing patterns and oriented gratings observed for the  
Difference of Gaussians and Gabor front-ends respectively. It is often claimed that end-to-  
end training produces banks of Gabor-like units in DNNs that resemble simple cells of V1  
360 (Krizhevsky et al., 2012). However, not only do these models learn a wide range of units,  
many of which do not resemble the receptive fields of neurons in early visual cortex, but  
our findings also highlight that hand-wiring the first convolutional layer(s) results in quite  
different learned representations in higher levels as well.

The learned features in the higher layers of the different models appear to be more similar  
365 than in early layers, in this case, appearing to converge to small blobs with antagonistic  
surrounds. Here it is hard to make any comparisons between the learned feature detectors  
in models and the brain because we have only a limited understanding of the features  
that drive single neurons in the higher levels of the visual system. Furthermore, any  
comparison between artificial and biological neural networks is further complicated by the  
370 fact that different methods of generating maximally activating images for single-units in  
ANNs can produce quite different outcomes, varying from unstructured noise to highly  
regular patterns, or even interpretable images (Nguyen et al., 2017). Similarly, different  
measures of single-unit selectivity provide very different estimates of selectivity (Gale et al.,  
2020). Importantly though, imposing fixed convolutional kernels in the early layers produces  
375 a major restructuring of the learned internal representations in otherwise standard DNNs  
— differences extending throughout the networks which are also found to have improved  
robustness and generalisation.

## 4 Discussion

The impressive performance of deep convolutional neural networks on various image classi-  
380 fication benchmarks has led to a great deal of interest within the neuroscience community,  
where researchers are now exploring the similarity of human and DNN vision (Schrimpf et al.,  
2018). Indeed, optimising DNNs for image classification has been demonstrated to provide  
the best fit to observed neural activity in the primate visual system (Yamins et al., 2014)  
and yield similar patterns of representations across categories of objects as measured by  
385 Representational Similarity Analysis (Kriegeskorte, 2015). On this view, end-to-end training  
is the best approach to date for both image classification benchmarks *and* modelling human  
vision, so few inductive biases beyond convolution need to be incorporated.

However, here we show that hard-coding a filter-bank in standard DNNs that approximates  
the organisation of the early visual system improves the performance on noise-perturbed  
390 or out-of-domain images, compared to their standard (unconstrained) counterparts trained  
end-to-end. For example, the biologically constrained models were much better able to  
classify line drawings, mimicking humans infants, who can readily identify them without  
any explicit training (Hochberg & Brooks, 1962). Typical measures of model performance  
overlook many of these more interesting and elusive properties of biological visual perception,  
395 notably their ability to generalise, potentially driving research towards more narrowly defined  
goals and away from being more faithful models of vision.

It is also important to acknowledge that our biologically-inspired networks showed limited  
improvements compared to standard DNNs in some conditions, and in a few cases performed  
more poorly than their end-to-end trained counterparts. Clearly adding a fixed convolutional  
400 front-end is far from sufficient to overcome the limitations of current DNNs as models of  
human vision. This is perhaps not surprising, considering how different typical artificial and

biological visual systems are, for instance the paradigm of rate-coding rather than temporal (spike) coding (Rullen & Thorpe, 2001), and the form of inputs they receive, such as static versus dynamic images. However, we argue that adding a biologically inspired front-end to standard DNNs represents a promising direction for advancement, especially for endowing them with better *o.o.d.* generalisation.

At an intuitive level, we may consider the benefit that biologically-inspired convolutional kernels confer on DNNs for classifying naturalistic images as arising from how they mimic the forms found through millions of years of evolution, which were useful and stable enough for decomposing natural visual scenes so as to be gradually enshrined in the genome. Both Difference of Gaussians and Gabor filters each incorporate antagonistic regions, whereby a feature of the visual scene (change in illumination) can be reliably detected and signalled in an energy efficient way (Vincent et al., 2005), the selection for which was likely driven by the need to constrain the high metabolic cost of transmitting information through spikes in the cortex (Lennie, 2003). By integrating their signals over a small spatial region, this also increases the reliability of the signal, by smoothing out sharp deviations in individually unreliable photoreceptors or pixels. In particular, developing Gabor-like receptive fields, with elongated, smoothed regions of opponency to signal changes, allows the organism or model to reliably detect bars and edges, which may then be used as the building blocks of shape — a key precursor to developing a concept of objects and a more reliable property for identification than low-level details such as texture.

Which features of biological vision need to be included in models in order to support human performance is still an open question. For example, the on- and off-centre receptive fields of retinal ganglion cells may simply be a means to compress the information from the photoreceptors through the retinal bottleneck in such a way as to be most faithfully reconstructed and expanded in the cortex (Vincent et al., 2005), without providing any additional benefit over Gabor-like receptive fields. This may explain the slightly mixed results with Gabor (only) versus Combined front-ends, such as their slightly weaker ability to classify silhouettes (compared to the Gabor front-end). If Gabor filters do indeed constitute an optimal “visual alphabet” as the first step in decomposing a natural visual scene when the information bottleneck is removed, then any additional (preceding) layer only serves to reduce the information content reaching them. It may be, however, that in order to cope with image inversions, additional pooling between Gabor filters of opposite phase is required — potentially an experimentally testable principle underpinning the finely structured organisation of the visual cortex.

The huge leap in performance and subsequent resurgence of interest in neural networks (then known as connectionist models) was brought about by the extraordinary increase in computational power through harnessing GPUs, along with access to much larger labelled image sets, which allowed much larger networks to be trained on vast amounts of training data (Krizhevsky et al., 2012). This trajectory still guides much of the community’s thinking on the best approach, typically eschewing such innate neurophysiological details and remaining largely empiricist in preferring end-to-end training. Despite a growing list of failures of such DNNs in classifying images under more challenging conditions (Geirhos et al., 2018; Geirhos, Temme et al., 2020), and demonstrations of striking differences between human and DNN vision (Dujmović et al., 2020; Malhotra et al., 2020), there is still the widespread view that many of these failures can be addressed by further improving the datasets that the models are trained on (Mehrer et al., 2017), or modifying the objective functions, including more emphasis on self-supervision (Chen et al., 2020) rather than constraining the models themselves with more inductive biases.

However, from examining the most activating features which are learnt throughout the networks, it is clear that constraining only the form of the initial convolutions has far-reaching

effects for higher level representations which may impact the model’s ability to generalise. It is clear from this perspective, that even if benchmark-based summaries of the model’s performance are highly similar to those of their biological counterparts, it is unlikely that they are achieved in the same way, or that the same hierarchical organisation has necessarily developed (Thompson et al., 2021). It is only when testing models on more challenging datasets, that humans can readily identify, for example the distorted *i.i.d.* images or *o.o.d.* images of the present work, that these differences are manifest. The challenge in developing biological models of vision is to build models that explain or at least recapitulate core human visual capacities, such as scale and translation invariance (Blything et al., 2021; Han et al., 2020), the capacity to identify objects in novel orientations in 3D space (Erdogan & Jacobs, 2017) and tolerance to occlusion (Tromans et al., 2012), amongst many other human visual (limitations and) capacities.

Even when a bottleneck and other architectural constraints are added to networks to encourage the formation of (more) Gabor filters (Lindsey et al., 2019), there is still no hyper-column organisation of the filters or other potentially important details, and crucially, models still learn a wide range of other (spatially high-frequency) filters (Krizhevsky et al., 2012, Fig. 3), many of which do not occur in V1 or elsewhere as far as we know. This may help explain the brittleness of current DNNs with these extra kernels over-fitting to specific training sets, making the models less robust to distortions of *i.i.d.* images and considerably less able to recognise *o.o.d.* images. Ultimately, whether the V1 hyper-column structure is innately specified, or develops through (genetically guided) assimilation of early visual experience, current unconstrained DNNs trained end-to-end fail to capture the human ability to identify degraded images or generalise to out-of-distribution datasets.

#### 4.1 Future work

To further enhance robustness and generalisation, it is likely that other modifications to the core components of ANNs are necessary, for example the addition of recurrent connections (Kietzmann, McClure et al., 2019; Kietzmann, Spoerer et al., 2019) or feedback connections (Kreiman & Serre, 2020). Also, in line with more standard approaches, it is undoubtedly important to also improve the training datasets and learning objectives in order to make models more similar to Intra-Temporal Cortex (IT), for example “soft” training labels (Peterson et al., 2019). In the current simulations we used supervised learning to train our models on CIFAR-10, and it would be interesting to see the impact of adopting different training objectives on larger datasets. For instance, there is some recent evidence that self-supervision on ImageNet can be used by networks to classify images more on the basis of shape compared to texture, consistent with the shape bias observed in humans (Geirhos, Narayanappa et al., 2020). In future work it will be important to understand how combining more inductive biases with better training regimes impacts on network performance.

#### 4.2 Conclusions

In the presented work we have shown that adding biological filter banks to constrain standard DNN architectures reduces their capacity to find superficial solutions by “shortcut learning” (Geirhos, Jacobsen et al., 2020). In particular, our Gabor and Combined (DoG+Gabor) front-end models learned more structured internal representations, were more robust to a number of common noise perturbations, and most importantly, showed better generalisation to our novel *o.o.d.* test sets. We take these findings as evidence that researchers should incorporate more biological constraints in DNNs to better mimic human performance, and indeed, it may be an important step in developing machine learning systems that generalise better. More generally, we also advocate a wider perspective on model evaluation than a

narrow focus on common benchmark scores, as this is likely to lead to models which miss  
500 many of the more interesting and useful properties of human vision.

## Acknowledgements

Funding: This project has received funding from the European Research Council (ERC) under the European Union’s Horizon 2020 research and innovation programme (Grant Agreement No. 741134).

505 We also thank Alex Hernandez-Garcia for his implementation of ALL-CNN.

## References

- Akbarinia, A. & Gil-Rodríguez, R. (2020). Deciphering image contrast in object classification deep networks. *Vision Research*, *173*, 61–76. <https://doi.org/10.1016/j.visres.2020.04.015>
- 510 Akbarinia, A. & Parraga, C. A. (2018a). Colour constancy beyond the classical receptive field. *IEEE Transactions on Pattern Analysis and Machine Intelligence*, *40*(9), 2081–2094. <https://doi.org/10.1109/TPAMI.2017.2753239>
- Akbarinia, A. & Parraga, C. A. (2018b). Feedback and surround modulated boundary detection. *International Journal of Computer Vision*, *126*, 1367–1380. <https://doi.org/10.1007/s11263-017-1035-5>
- 515 Alahi, A., Ortiz, R. & Vandergheynst, P. (2012). FREAK: Fast retina keypoint, In *2012 IEEE conference on computer vision and pattern recognition*. <https://doi.org/10.1109/CVPR.2012.6247715>
- Alekseev, A. & Bobe, A. (2019, April 30). *GaborNet: Gabor filters with learnable parameters in deep convolutional neural networks* [Comment: 10 pages, 6 figures, 3 tables, preprint]. <http://arxiv.org/abs/1904.13204>
- 520 Baker, N., Lu, H., Erlikhman, G. & Kellman, P. J. (2018). Deep convolutional networks do not classify based on global object shape (W. Einhäuser, Ed.). *PLOS Computational Biology*, *14*(12), e1006613. <https://doi.org/10.1371/journal.pcbi.1006613>
- 525 Bell, A. J. & Sejnowski, T. J. (1997). The “independent components” of natural scenes are edge filters. *Vision Research*, *37*(23), 3327–3338. [https://doi.org/10.1016/S0042-6989\(97\)00121-1](https://doi.org/10.1016/S0042-6989(97)00121-1)
- Blything, R., Biscione, V., Vankov, I. I., Ludwig, C. J. H. & Bowers, J. S. (2021). The human visual system and CNNs can both support robust online translation tolerance following extreme displacements. *Journal of Vision*, *21*(2), <https://arvojournals.org/arvo/contentPublic/journal/7362-21-2-9>“1613991730.89038.pdf”, 9. <https://doi.org/10.1167/jov.21.2.9>
- 530 Bolukbasi, T., Chang, K.-W., Zou, J. Y., Saligrama, V. & Kalai, A. T. (2016). Man is to Computer Programmer as Woman is to Homemaker? Debiasing Word Embeddings, Barcelona, Spain, Curran Associates Inc. <https://doi.org/10.5555/3157382.3157584>
- 535 Briggman, K. L., Helmstaedter, M. & Denk, W. (2011). Wiring specificity in the direction-selectivity circuit of the retina. *Nature*, *471*(7337), 183–188. <https://doi.org/10.1038/nature09818>
- Cadena, S. A., Denfield, G. H., Walker, E. Y., Gatys, L. A., Tolia, A. S., Bethge, M. & Ecker, A. S. (2019). Deep convolutional models improve predictions of macaque V1 responses to natural images (W. Einhäuser, Ed.). *PLOS Computational Biology*, *15*(4), e1006897. <https://doi.org/10.1371/journal.pcbi.1006897>
- 540

- Chen, T., Kornblith, S., Norouzi, M. & Hinton, G. (2020, June 30). *A Simple Framework for Contrastive Learning of Visual Representations* [Comment: ICML'2020. Code and pretrained models at <https://github.com/google-research/simclr>]. <http://arxiv.org/abs/2002.05709>
- 545 Dapello, J., Marques, T., Schrimpf, M., Geiger, F., Cox, D. D. & DiCarlo, J. J. (2020, June 17). *Simulating a Primary Visual Cortex at the Front of CNNs Improves Robustness to Image Perturbations* (preprint). <https://doi.org/10.1101/2020.06.16.154542>
- Deza, A. & Konkle, T. (2021). Emergent properties of foveated perceptual systems [arXiv:2006.07991]. <https://arxiv.org/abs/2006.07991>
- 550 Dujmović, M., Malhotra, G. & Bowers, J. S. (2020). What do adversarial images tell us about human vision? *eLife*, 9, e55978. <https://doi.org/10.7554/eLife.55978>
- Erdogan, G. & Jacobs, R. A. (2017). Visual shape perception as Bayesian inference of 3D object-centered shape representations. *Psychological Review*, 124(6), 740–761. <https://doi.org/10.1037/rev0000086>
- 555 Erhan, D., Bengio, Y., Courville, A. & Vincent, P. (2009). *Visualizing higher-layer features of a deep network* (tech. rep. No. 1341) [Also presented at the ICML 2009 Workshop on Learning Feature Hierarchies, Montréal, Canada.]. University of Montreal. Also presented at the ICML 2009 Workshop on Learning Feature Hierarchies, Montréal, Canada.
- 560 Feinman, R. & Lake, B. M. (2018, June 13). *Learning Inductive Biases with Simple Neural Networks* [Comment: Published in Proceedings of the 40th Annual Meeting of the Cognitive Science Society, July 2018]. <http://arxiv.org/abs/1802.02745>
- Gaier, A. & Ha, D. (2019, September 5). *Weight Agnostic Neural Networks* [Comment: To appear at NeurIPS 2019, selected for a spotlight presentation]. <http://arxiv.org/abs/1906.04358>
- 565 Gale, E. M., Martin, N., Blything, R., Nguyen, A. & Bowers, J. S. (2020). Are there any ‘object detectors’ in the hidden layers of CNNs trained to identify objects or scenes? *Vision Research*, 176, 60–71. <https://doi.org/10.1016/j.visres.2020.06.007>
- 570 Geirhos, R., Jacobsen, J.-H., Michaelis, C., Zemel, R., Brendel, W., Bethge, M. & Wichmann, F. A. (2020). Shortcut learning in deep neural networks. *Nature Machine Intelligence*, 2(11), 665–673. <https://doi.org/10.1038/s42256-020-00257-z>
- Geirhos, R., Janssen, D. H. J., Schütt, H. H., Rauber, J., Bethge, M. & Wichmann, F. A. (2018, December 11). *Comparing deep neural networks against humans: Object recognition when the signal gets weaker* [Comment: updated article with reference to resulting publication (Geirhos et al, NeurIPS 2018)]. <http://arxiv.org/abs/1706.06969>
- 575 Geirhos, R., Narayanappa, K., Mitzkus, B., Bethge, M., Wichmann, F. A. & Brendel, W. (2020, October 16). *On the surprising similarities between supervised and self-supervised models*. <http://arxiv.org/abs/2010.08377>
- 580 Geirhos, R., Rubisch, P., Michaelis, C., Bethge, M., Wichmann, F. A. & Brendel, W. (2019, January 14). *ImageNet-trained CNNs are biased towards texture; increasing shape bias improves accuracy and robustness* [Comment: Accepted at ICLR 2019 (oral)]. <http://arxiv.org/abs/1811.12231>
- Geirhos, R., Temme, C. R. M., Rauber, J., Schütt, H. H., Bethge, M. & Wichmann, F. A. (2020, October 23). *Generalisation in humans and deep neural networks* [Comment: Added optimal probability aggregation method to appendix]. <http://arxiv.org/abs/1808.08750>
- 585 Guclu, U. & van Gerven, M. A. J. (2015). Deep Neural Networks Reveal a Gradient in the Complexity of Neural Representations across the Ventral Stream. *Journal of Neuroscience*, 35(27), 10005–10014. <https://doi.org/10.1523/JNEUROSCI.5023-14.2015>
- 590

- Han, Y., Roig, G., Geiger, G. & Poggio, T. (2020). Scale and translation-invariance for novel objects in human vision. *Scientific Reports*, *10*(1), 1411. <https://doi.org/10.1038/s41598-019-57261-6>
- 595 He, K., Zhang, X., Ren, S. & Sun, J. (2016). Deep residual learning for image recognition, In *2016 IEEE Conference on Computer Vision and Pattern Recognition (CVPR)*. <https://doi.org/10.1109/CVPR.2016.90>
- Hochberg, J. & Brooks, V. (1962). Pictorial Recognition as an Unlearned Ability: A Study of One Child's Performance. *The American Journal of Psychology*, *75*(4), jstor 1420286, 624. <https://doi.org/10.2307/1420286>
- 600 Ilyas, A., Santurkar, S., Tsipras, D., Engstrom, L., Tran, B. & Madry, A. (2019, August 12). *Adversarial Examples Are Not Bugs, They Are Features*. <http://arxiv.org/abs/1905.02175>
- Khaligh-Razavi, S.-M. & Kriegeskorte, N. (2014). Deep Supervised, but Not Unsupervised, Models May Explain IT Cortical Representation (J. Diedrichsen, Ed.). *PLoS Computational Biology*, *10*(11), e1003915. <https://doi.org/10.1371/journal.pcbi.1003915>
- 605 Kietzmann, T. C., McClure, P. & Kriegeskorte, N. (2019, January 25). Deep Neural Networks in Computational Neuroscience. In *Oxford Research Encyclopedia of Neuroscience*. Oxford University Press. <https://doi.org/10.1093/acrefore/9780190264086.013.46>
- 610 Kietzmann, T. C., Spoerer, C. J., Sörensen, L. K. A., Cichy, R. M., Hauk, O. & Kriegeskorte, N. (2019). Recurrence is required to capture the representational dynamics of the human visual system. *Proceedings of the National Academy of Sciences*, *116*(43), 21854–21863. <https://doi.org/10.1073/pnas.1905544116>
- Kreiman, G. & Serre, T. (2020). Beyond the feedforward sweep: Feedback computations in the visual cortex. *Annals of the New York Academy of Sciences*, *1464*(1), 222–241. <https://doi.org/10.1111/nyas.14320>
- 615 Kriegeskorte, N. (2015). Deep Neural Networks: A New Framework for Modeling Biological Vision and Brain Information Processing. *Annual Review of Vision Science*, *1*(1), 417–446. <https://doi.org/10.1146/annurev-vision-082114-035447>
- 620 Krizhevsky, A., Sutskever, I. & Hinton, G. E. (2012). ImageNet Classification with Deep Convolutional Neural Networks (F. Pereira, C. J. C. Burges, L. Bottou & K. Q. Weinberger, Eds.). In F. Pereira, C. J. C. Burges, L. Bottou & K. Q. Weinberger (Eds.), *Advances in neural information processing systems*, Lake Tahoe, Nevada, Curran Associates Inc. <http://papers.nips.cc/paper/4824-imagenet-classification-with-deep-convolutional-neural-networks>
- 625 Kubilius, J., Bracci, S. & Op de Beeck, H. P. (2016). Deep Neural Networks as a Computational Model for Human Shape Sensitivity (M. Bethge, Ed.). *PLoS Computational Biology*, *12*(4), e1004896. <https://doi.org/10.1371/journal.pcbi.1004896>
- Kubilius, J., Schrimpf, M., Nayebi, A., Bear, D., Yamins, D. L. K. & DiCarlo, J. J. (2018, September 4). *CORnet: Modeling the Neural Mechanisms of Core Object Recognition* (preprint). Neuroscience. <https://doi.org/10.1101/408385>
- 630 Lake, B. M., Ullman, T. D., Tenenbaum, J. B. & Gershman, S. J. (2017). Building machines that learn and think like people. *Behavioral and Brain Sciences*, *40*, e253. <https://doi.org/10.1017/S0140525X16001837>
- 635 LeCun, Y., Bengio, Y. & Hinton, G. (2015). Deep learning. *Nature*, *521*(7553), 436–444. <https://doi.org/10.1038/nature14539>
- Lennie, P. (2003). The cost of cortical computation. *Current Biology*, *13*, 493–497. [https://doi.org/10.1016/S0960-9822\(03\)00135-0](https://doi.org/10.1016/S0960-9822(03)00135-0)
- 640 Lindsey, J., Ocko, S. A., Ganguli, S. & Deny, S. (2019, January 10). *A Unified Theory of Early Visual Representations from Retina to Cortex through Anatomically Constrained Deep CNNs* (preprint). Neuroscience. <https://doi.org/10.1101/511535>



- Malhotra, G., Evans, B. D. & Bowers, J. S. (2020). Hiding a plane with a pixel: Examining shape-bias in CNNs and the benefit of building in biological constraints. *Vision Research*, 174, 57–68. <https://doi.org/10.1016/j.visres.2020.04.013>
- 645 Malhotra, G., Evans, B. & Bowers, J. (2019). Adding biological constraints to CNNs makes image classification more human-like and robust, In *2019 Conference on Cognitive Computational Neuroscience*. 2019 Conference on Cognitive Computational Neuroscience, Berlin, Germany, Cognitive Computational Neuroscience. <https://doi.org/10.32470/CCN.2019.1212-0>
- 650 Mehrer, J., Kietzmann, T. C. & Kriegeskorte, N. (2017). Deep neural networks trained on ecologically relevant categories better explain human IT, In *Conference on cognitive computational neuroscience*, New York, NY, USA. [https://ccneuro.org/2017/abstracts/abstract\\_3000198.pdf](https://ccneuro.org/2017/abstracts/abstract_3000198.pdf)
- 655 Meng, F., Wang, X., Shao, F., Wang, D. & Hua, X. (2019). Energy-Efficient Gabor Kernels in Neural Networks with Genetic Algorithm Training Method. *Electronics*, 8(1), 105. <https://doi.org/10.3390/electronics8010105>
- 660 Nguyen, A., Clune, J., Bengio, Y., Dosovitskiy, A. & Yosinski, J. (2017, July). Plug & Play Generative Networks: Conditional Iterative Generation of Images in Latent Space, In *2017 IEEE Conference on Computer Vision and Pattern Recognition (CVPR)*. 2017 IEEE Conference on Computer Vision and Pattern Recognition (CVPR), Honolulu, HI, IEEE. <https://doi.org/10.1109/CVPR.2017.374>
- Olshausen, B. A. & Field, D. J. (1996). Emergence of simple-cell receptive field properties by learning a sparse code for natural images. *Nature*, 381(6583), 607–609. <https://doi.org/10.1038/381607a0>
- 665 Peterson, J. C., Battleday, R. M., Griffiths, T. L. & Russakovsky, O. (2019, August 19). *Human uncertainty makes classification more robust* [Comment: In Proceedings of the 2019 IEEE International Conference on Computer Vision (ICCV)]. <http://arxiv.org/abs/1908.07086>
- 670 Petkov, N. & Krüzinga, P. (1997). Computational models of visual neurons specialised in the detection of periodic and aperiodic oriented visual stimuli: Bar and grating cells. *Biological Cybernetics*, 76(2), 83–96. <https://doi.org/10.1007/s004220050323>
- 675 Richards, B. A., Lillicrap, T. P., Beaudoin, P., Bengio, Y., Bogacz, R., Christensen, A., Clopath, C., Costa, R. P., de Berker, A., Ganguli, S., Gillon, C. J., Hafner, D., Kepecs, A., Kriegeskorte, N., Latham, P., Lindsay, G. W., Miller, K. D., Naud, R., Pack, C. C., ... Kording, K. P. (2019). A deep learning framework for neuroscience. *Nature Neuroscience*, 22(11), 1761–1770. <https://doi.org/10.1038/s41593-019-0520-2>
- Riesenhuber, M. & Poggio, T. (1999). Hierarchical models of object recognition in cortex. *Nature Neuroscience*, 2, 1019–1025. <https://doi.org/10.1038/14819>
- 680 Rullen, R. V. & Thorpe, S. J. (2001). Rate Coding Versus Temporal Order Coding: What the Retinal Ganglion Cells Tell the Visual Cortex. *Neural Computation*, 13(6), 1255–1283. <https://doi.org/10.1162/08997660152002852>
- 685 Sarwar, S. S., Panda, P. & Roy, K. (2017, July). Gabor filter assisted energy efficient fast learning Convolutional Neural Networks, In *2017 IEEE/ACM International Symposium on Low Power Electronics and Design (ISLPED)*. 2017 IEEE/ACM International Symposium on Low Power Electronics and Design (ISLPED), Taipei, Taiwan, IEEE. <https://doi.org/10.1109/ISLPED.2017.8009202>
- 690 Schrimpf, M., Kubilius, J., Hong, H., Majaj, N. J., Rajalingham, R., Issa, E. B., Kar, K., Bashivan, P., Prescott-Roy, J., Geiger, F., Schmidt, K., Yamins, D. L. K. & DiCarlo, J. J. (2018). Brain-Score: Which Artificial Neural Network for Object Recognition is most Brain-Like? <https://doi.org/10.1101/407007>

- Shepard, R. N. (1994). Perceptual-cognitive universals as reflections of the world. *Psychonomic Bulletin & Review*, 1(1), 2–28. <https://doi.org/10.3758/BF03200759>
- Simonyan, K. & Zisserman, A. (2015, April 10). *Very Deep Convolutional Networks for Large-Scale Image Recognition*. <http://arxiv.org/abs/1409.1556>
- 695 Sinz, F. H., Pitkow, X., Reimer, J., Bethge, M. & Tolias, A. S. (2019). Engineering a Less Artificial Intelligence. *Neuron*, 103(6), 967–979. <https://doi.org/10.1016/j.neuron.2019.08.034>
- Springenberg, J. T., Dosovitskiy, A., Brox, T. & Riedmiller, M. (2015, April 13). *Striving for Simplicity: The All Convolutional Net* [Comment: accepted to ICLR-2015 workshop track; no changes other than style]. <http://arxiv.org/abs/1412.6806>
- 700 Strathern, M. (1997). ‘improving ratings’: Audit in the british university system. *European Review*, 5(3), 305–321. [https://doi.org/10.1002/\(SICI\)1234-981X\(199707\)5:3<305::AID-EURO184>3.0.CO;2-4](https://doi.org/10.1002/(SICI)1234-981X(199707)5:3<305::AID-EURO184>3.0.CO;2-4)
- Szegedy, C., Zaremba, W., Sutskever, I., Bruna, J., Erhan, D., Goodfellow, I. & Fergus, R. (2014, February 19). *Intriguing properties of neural networks*. <http://arxiv.org/abs/1312.6199>
- 705 Thompson, J. A., Bengio, Y., Formisano, E. & Schönwiesner, M. (2021, January 27). *Training neural networks to recognize speech increased their correspondence to the human auditory pathway but did not yield a shared hierarchy of acoustic features* (preprint). Neuroscience. <https://doi.org/10.1101/2021.01.26.428323>
- 710 Tromans, J. M., Higgins, I. & Stringer, S. M. (2012). Learning view invariant recognition with partially occluded objects. *Frontiers in Computational Neuroscience*, 6. <https://doi.org/10.3389/fncom.2012.00048>
- Vincent, B. T., Baddeley, R. J., Troscianko, T. & Gilchrist, I. D. (2005). Is the early visual system optimised to be energy efficient? *Network: Computation in Neural Systems*, 16(2-3), 175–190. <https://doi.org/10.1080/09548980500290047>
- 715 Wu, S., Geirhos, R. & Wichmann, F. A. (2019). An early vision-inspired visual recognition model improves robustness against image distortions compared to a standard convolutional neural network [Poster W 74], Bernstein Conference. Poster W 74. <https://doi.org/10.12751/nncn.bc2019.0091>
- 720 Yamins, D. L. K., Hong, H., Cadieu, C. F., Solomon, E. A., Seibert, D. & DiCarlo, J. J. (2014). Performance-optimized hierarchical models predict neural responses in higher visual cortex. *Proceedings of the National Academy of Sciences*, 111(23), 8619–8624. <https://doi.org/10.1073/pnas.1403112111>
- 725 Yamins, D. L. K. & DiCarlo, J. J. (2016). Using goal-driven deep learning models to understand sensory cortex. *Nature Neuroscience*, 19(3), 356–365. <https://doi.org/10.1038/nn.4244>
- Zador, A. M. (2019). A critique of pure learning and what artificial neural networks can learn from animal brains. *Nature Communications*, 10(1), 3770. <https://doi.org/10.1038/s41467-019-11786-6>
- 730

## Appendix

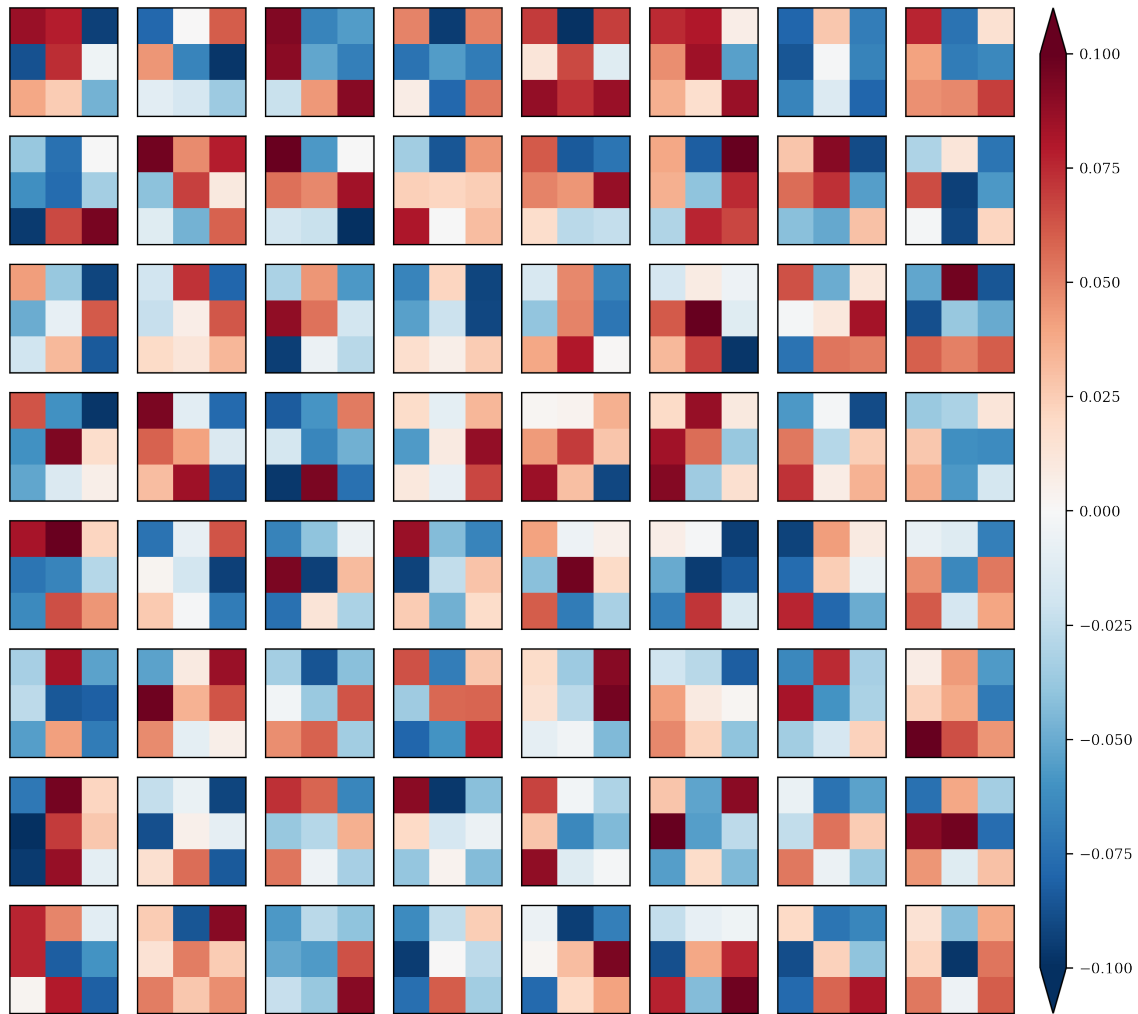

Figure 11: Illustration of the first convolutional layer kernels obtained through end-to-end training in the VGG-16 model architecture.

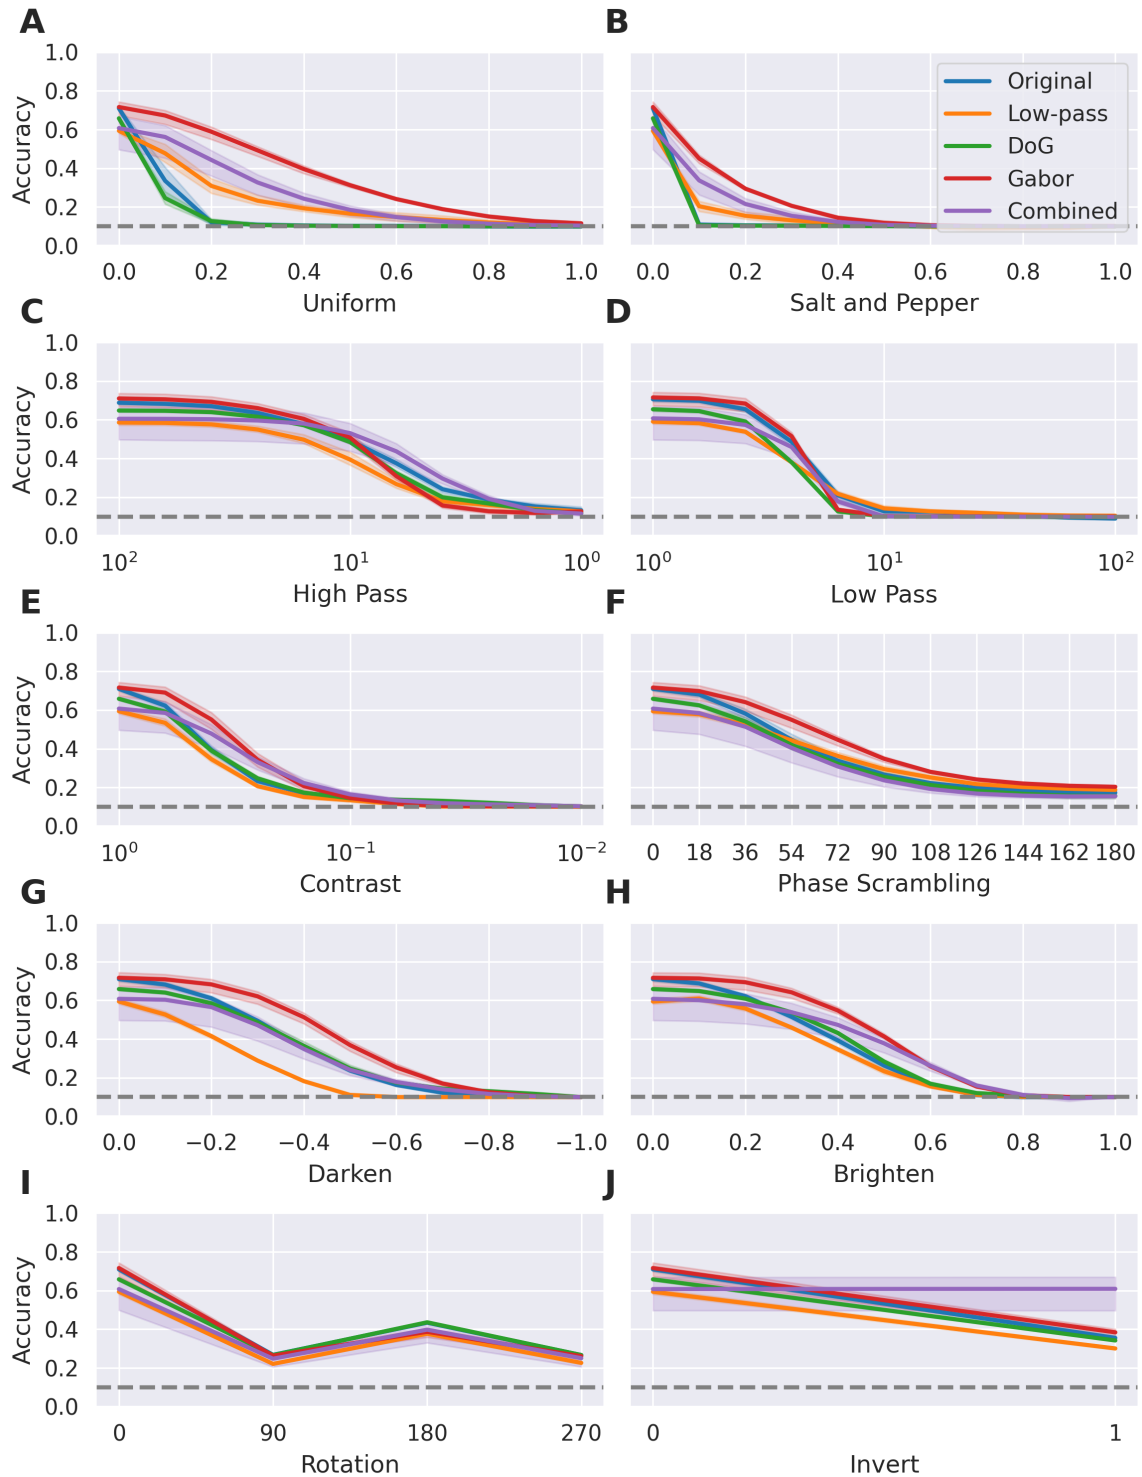

Figure 12: Classification accuracy under different types and degrees of noise perturbation for ALL-CNN based models. Shading around each line indicates the 95% confidence interval across the five random seeds. The grey dashed lines represent chance level (10%) performance.

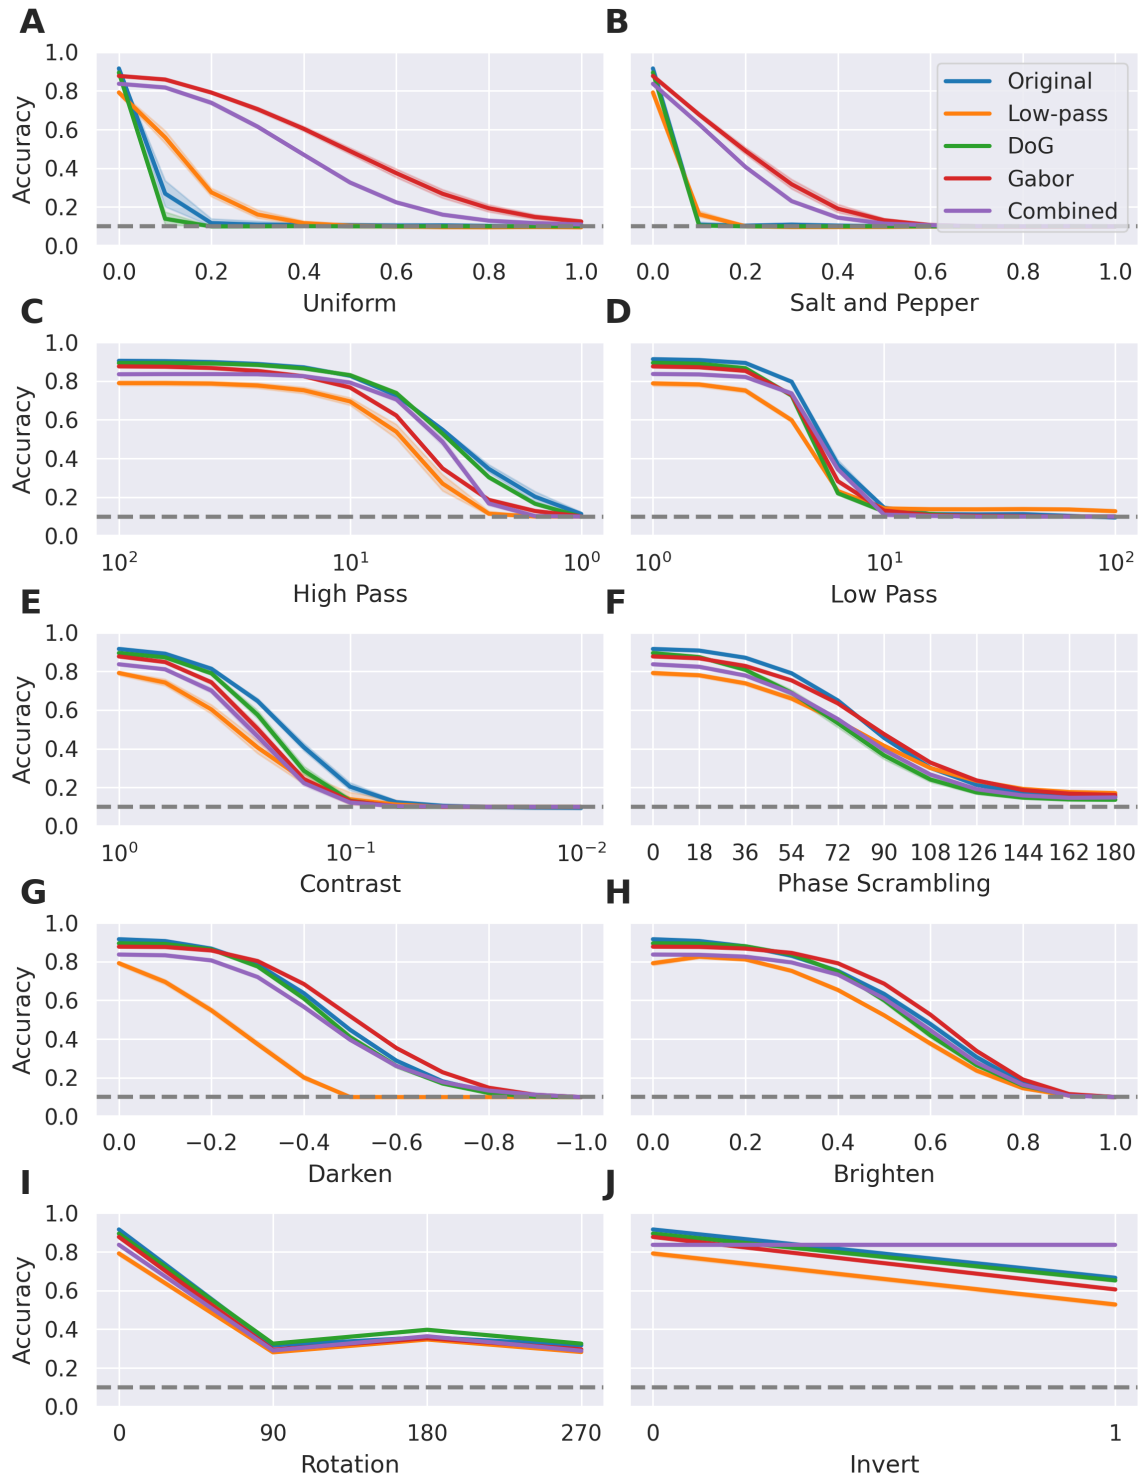

Figure 13: Classification accuracy under different types and degrees of noise perturbation for ResNet50 based models. Shading around each line indicates the 95% confidence interval across the five random seeds. The grey dashed lines represent chance level (10%) performance.

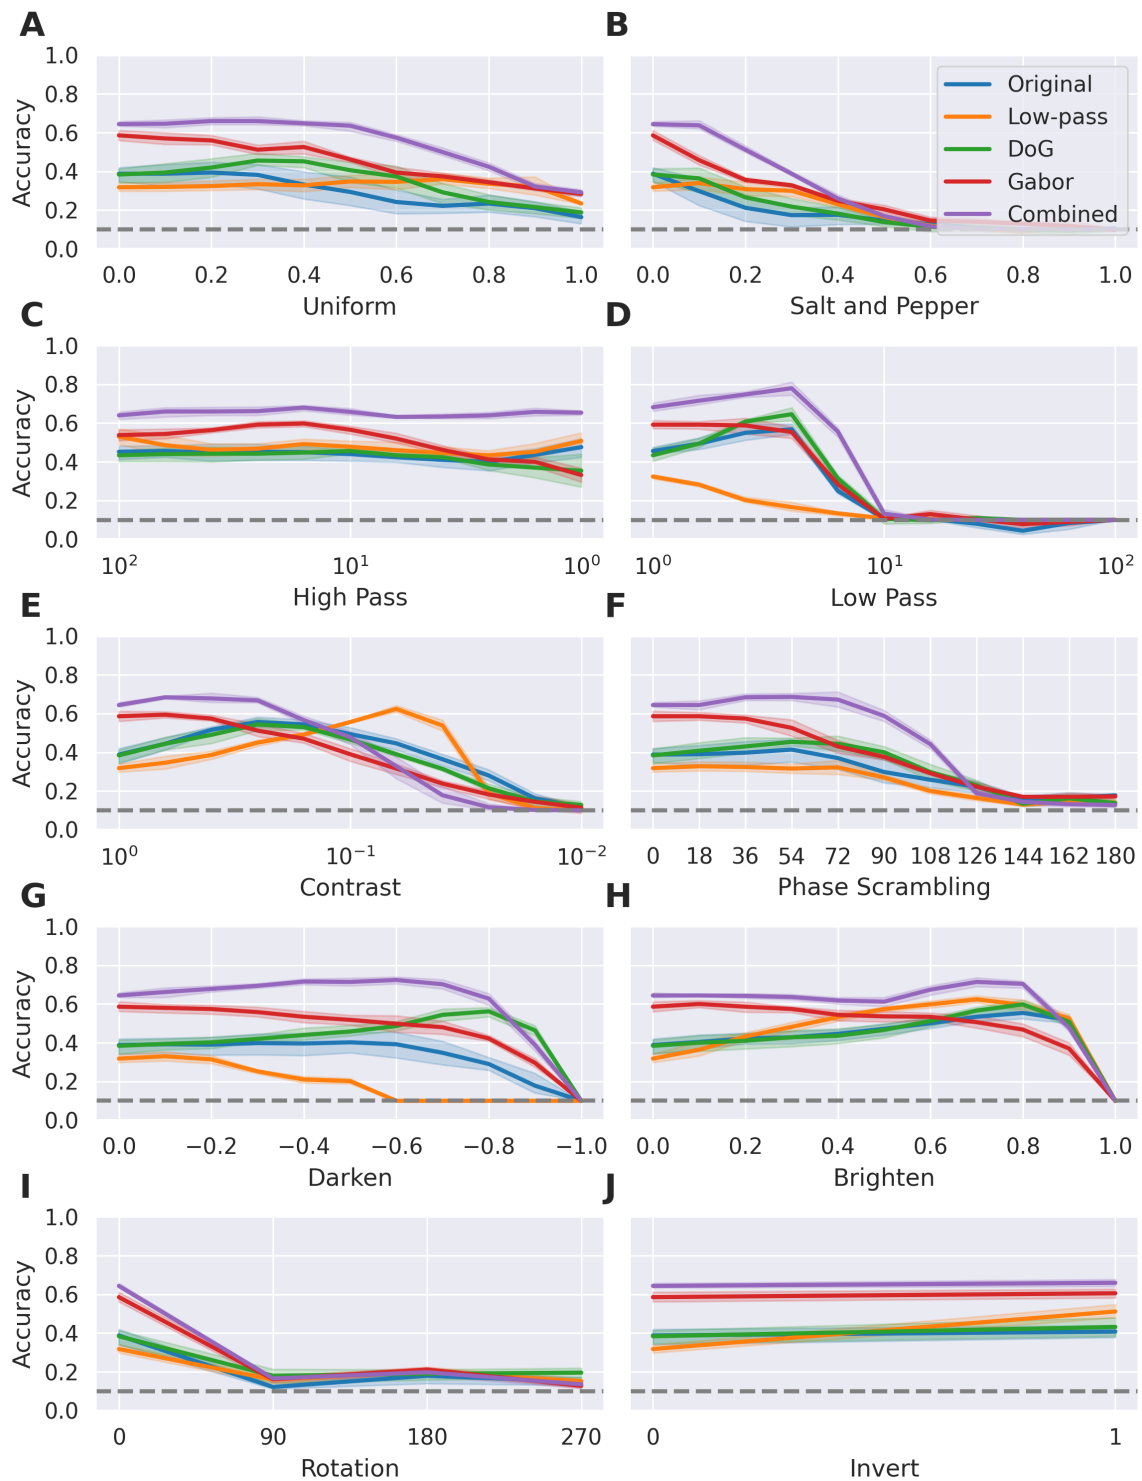

Figure 14: Classification accuracy of VGG-16 based models on perturbed inverted line drawings. The models with biologically-inspired convolutional front-ends (notably Gabor and Combined front-ends) typically maintain their advantage over the Original (end-to-end trained) models with the exception of low contrast perturbations. Shading around each line indicates the 95% confidence interval across the five random seeds. The grey dashed lines represent chance level (10%) performance.

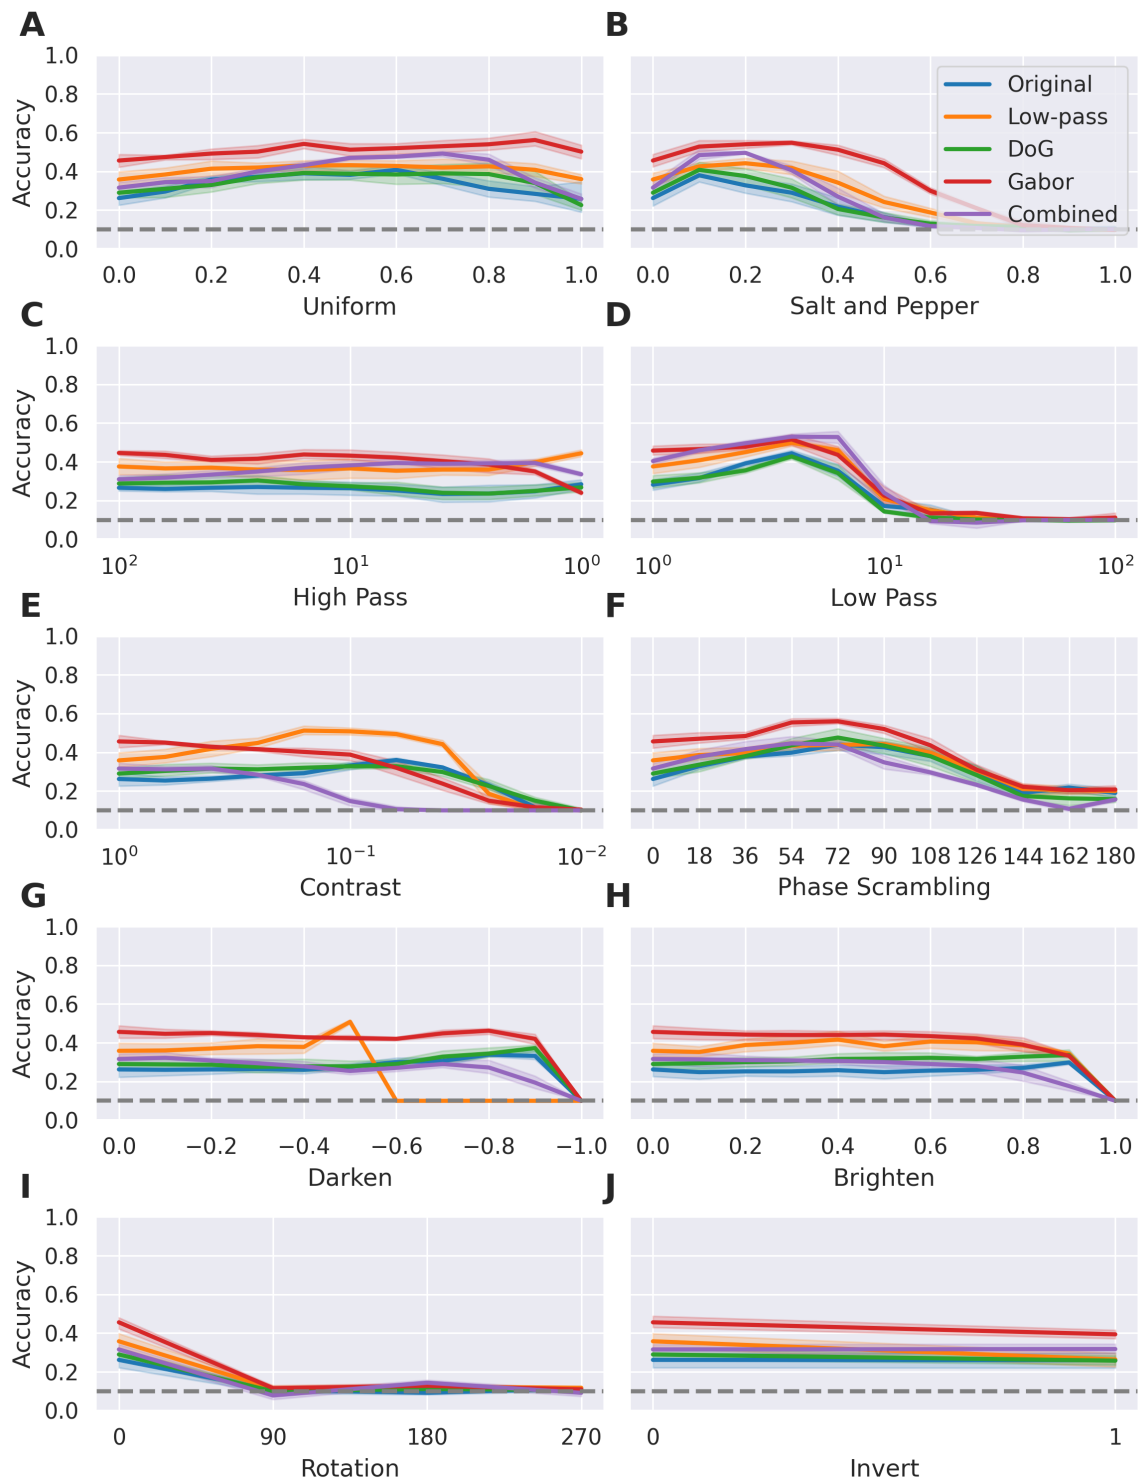

Figure 15: Classification accuracy of VGG-16 based models on perturbed silhouettes. The models with biologically-inspired convolutional front-ends (notably Gabor and Combined front-ends) typically maintain their advantage over the Original (end-to-end trained) models with the exception of low contrast perturbations. Shading around each line indicates the 95% confidence interval across the five random seeds. The grey dashed lines represent chance level (10%) performance.

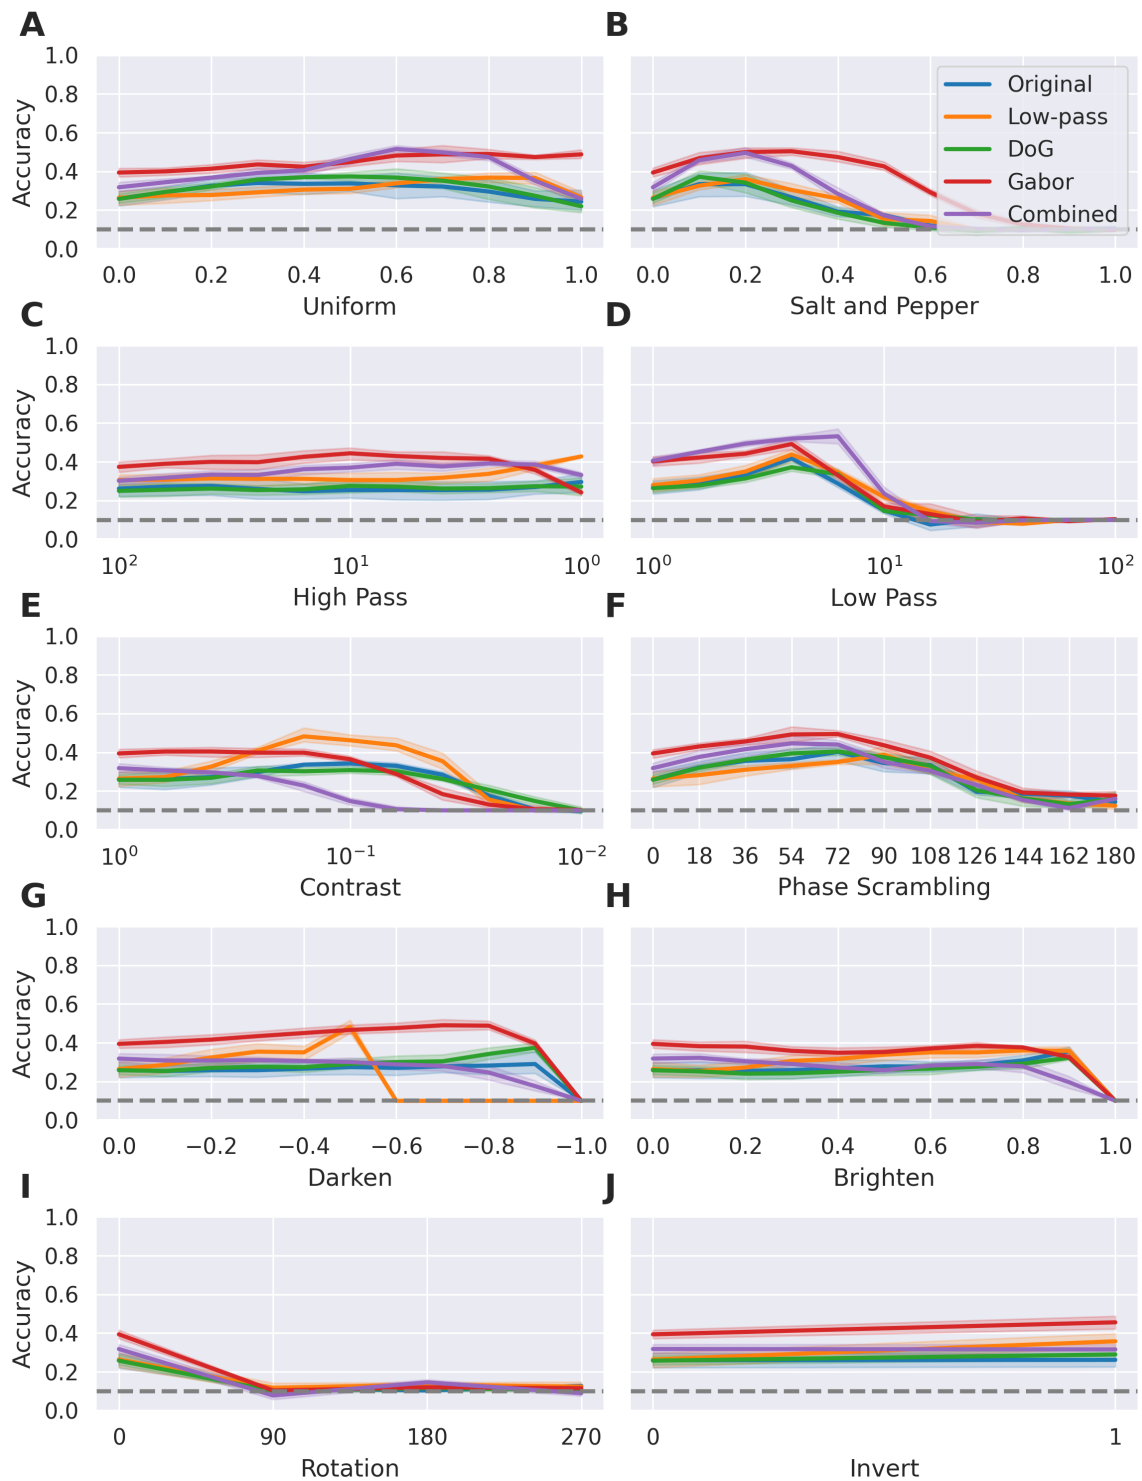

Figure 16: Classification accuracy of VGG-16 based models on perturbed inverted silhouettes. The models with biologically-inspired convolutional front-ends (notably Gabor and Combined front-ends) typically maintain their advantage over the Original (end-to-end trained) models with the exception of low contrast perturbations. Shading around each line indicates the 95% confidence interval across the five random seeds. The grey dashed lines represent chance level (10%) performance.



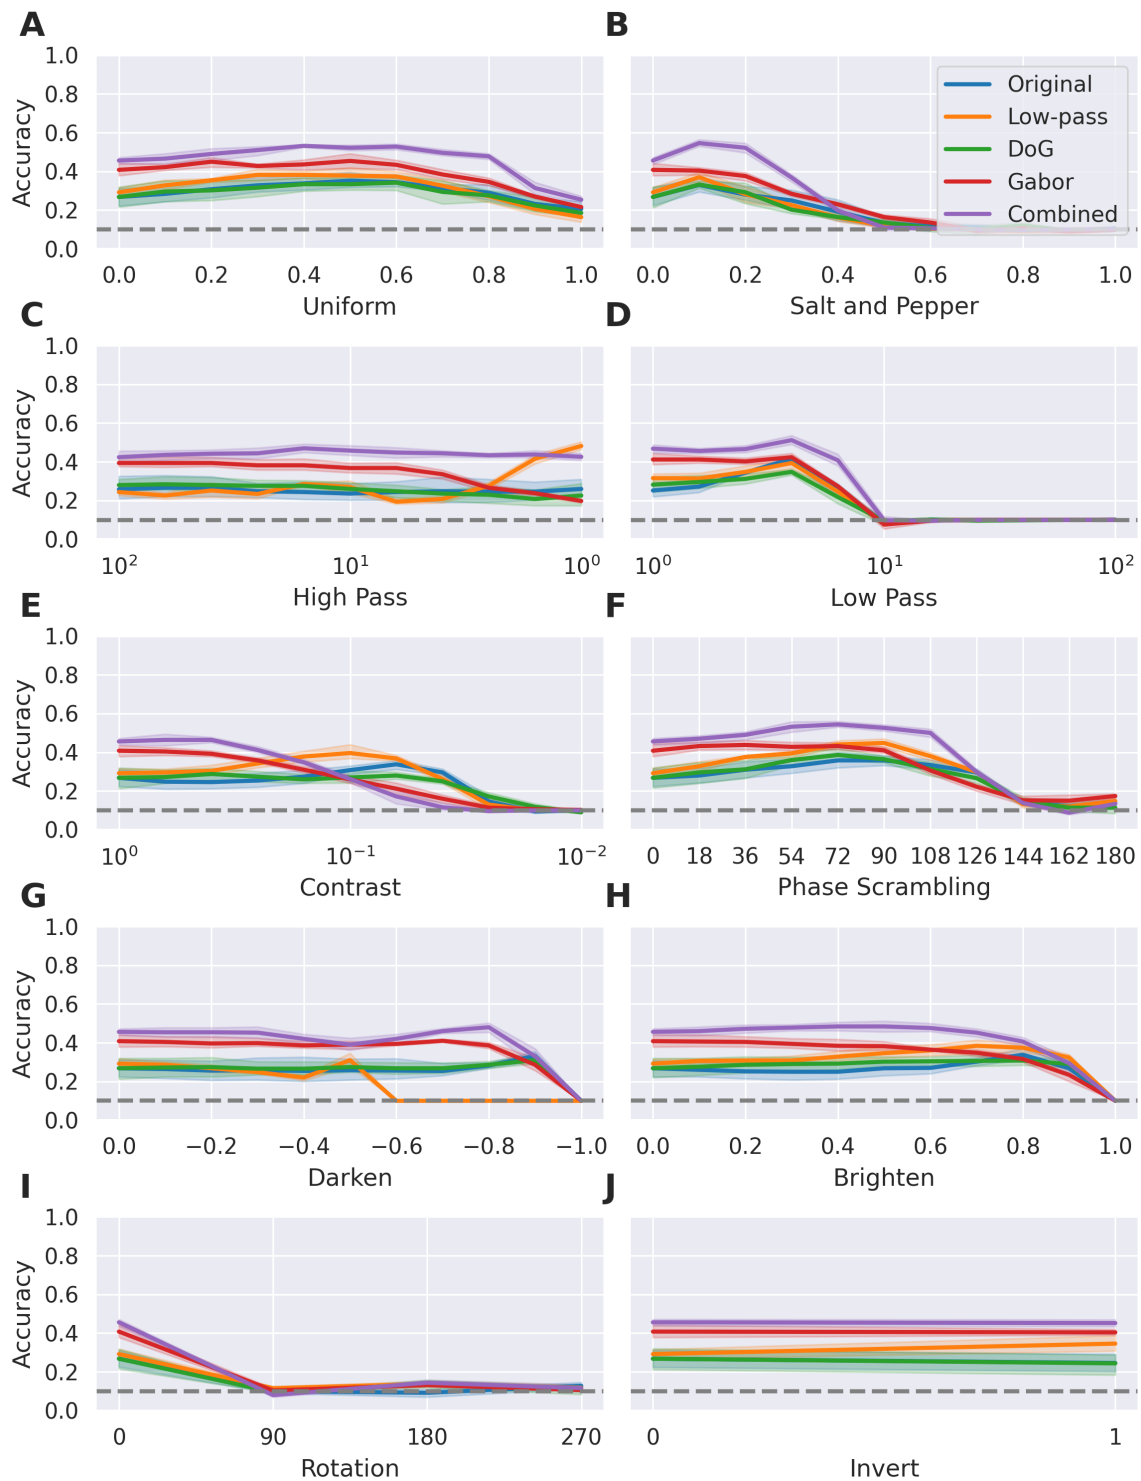

Figure 17: Classification accuracy of VGG-16 based models on perturbed contours. The models with biologically-inspired convolutional front-ends (notably Gabor and Combined front-ends) typically maintain their advantage over the Original (end-to-end trained) models with the exception of low contrast perturbations. Shading around each line indicates the 95% confidence interval across the five random seeds. The grey dashed lines represent chance level (10%) performance.

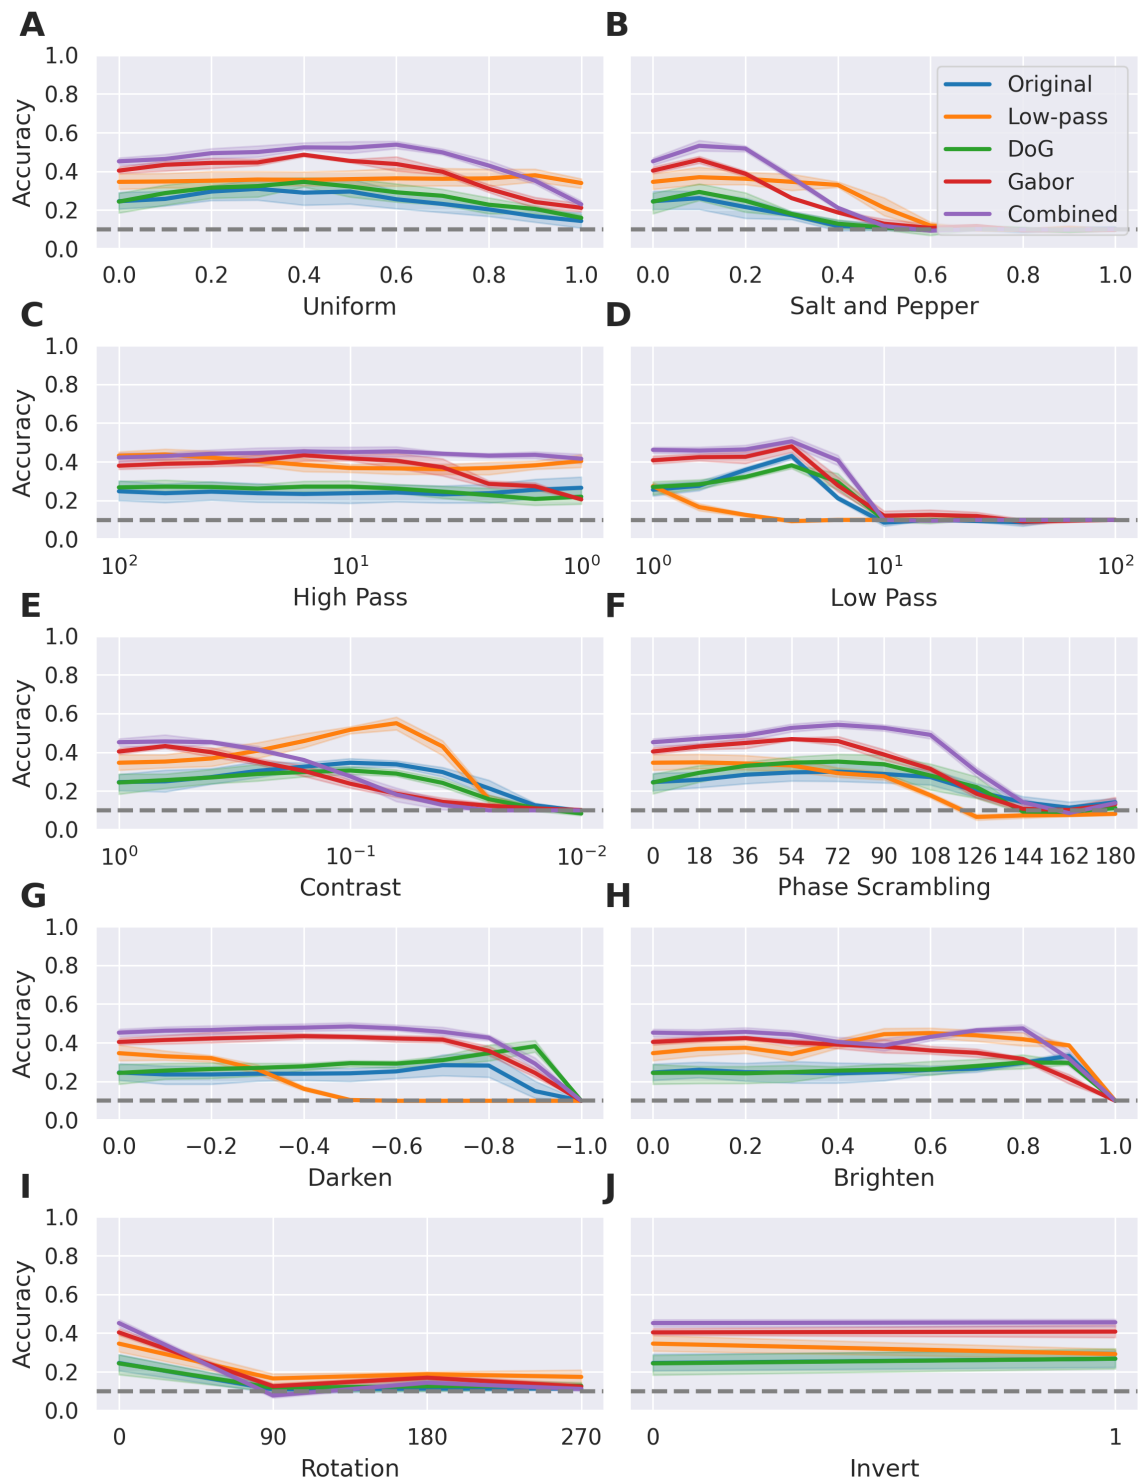

Figure 18: Classification accuracy of VGG-16 based models on perturbed inverted contours. The models with biologically-inspired convolutional front-ends (notably Gabor and Combined front-ends) typically maintain their advantage over the Original (end-to-end trained) models with the exception of low contrast perturbations. Shading around each line indicates the 95% confidence interval across the five random seeds. The grey dashed lines represent chance level (10%) performance.
